# Puerarin alleviates osteoporosis in the ovariectomy-induced mice by suppressing osteoclastogenesis via inhibition of TRAF6/ROS-dependent MAPK/NF- $\kappa$ B signaling pathways

Long Xiao<sup>1,2,\*</sup>, Mengdan Zhong<sup>3,\*</sup>, Yu Huang<sup>4,5</sup>, Jie Zhu<sup>1</sup>, Wenkai Tang<sup>1</sup>, Danyong Li<sup>1</sup>, Jiandong Shi<sup>1</sup>, Aiqing Lu<sup>1</sup>, Huilin Yang<sup>2</sup>, Dechun Geng<sup>2</sup>, Hong Li<sup>3</sup>, Zhirong Wang<sup>1</sup>

<sup>1</sup>Department of Orthopedics, Zhangjiagang TCM Hospital Affiliated to Nanjing University of Chinese Medicine, Zhangjiagang 215600, China

<sup>2</sup>Department of Orthopedics, The First Affiliated Hospital of Soochow University, Suzhou 215006, China

<sup>3</sup>Department of Endocrinology, Zhangjiagang TCM Hospital Affiliated to Nanjing University of Chinese Medicine, Zhangjiagang 215600, China

<sup>4</sup>Department of Gynecology, The First Affiliated Hospital of Soochow University, Suzhou 215006, China

<sup>5</sup>Department of Gynecology, The First People's Hospital of Zhangjiagang, Soochow University, Zhangjiagang 215600, China

\*Equal contribution

**Correspondence to:** Dechun Geng, Hong Li, Zhirong Wang; email: [szgengdc@suda.edu.cn](mailto:szgengdc@suda.edu.cn), [zigzyy\\_lihong@njucm.edu.cn](mailto:zigzyy_lihong@njucm.edu.cn), [zigfy\\_spine\\_wzr@njucm.edu.cn](mailto:zigfy_spine_wzr@njucm.edu.cn)

**Keywords:** puerarin, osteoclast, reactive oxygen species, osteoporosis

**Received:** January 15, 2020

**Accepted:** August 1, 2020

**Published:** November 7, 2020

**Copyright:** © 2020 Xiao et al. This is an open access article distributed under the terms of the [Creative Commons Attribution License](https://creativecommons.org/licenses/by/3.0/) (CC BY 3.0), which permits unrestricted use, distribution, and reproduction in any medium, provided the original author and source are credited.

## ABSTRACT

In this study, we investigated the mechanisms by which puerarin alleviates osteoclast-related loss of bone mass in ovariectomy (OVX)-induced osteoporosis model mice. Puerarin-treated OVX mice exhibited higher bone density, fewer tartrate-resistant acid phosphatase (TRAcP)-positive osteoclasts, and levels of lower reactive oxygen species (ROS) within bone tissues than vehicle-treated OVX mice. Puerarin suppressed *in vitro* osteoclast differentiation, hydroxyapatite resorption activity, and expression of osteoclastogenesis-related genes, such as NFATc1, MMP9, CTSK, Acp5 and c-Fos, in RANKL-induced bone marrow macrophages (BMMs) and RAW264.7 cells. It also reduced intracellular ROS levels by suppressing expression of TRAF6 and NADPH oxidase 1 (NOX1) and increasing expression of antioxidant enzymes such as heme oxygenase-1 (HO-1). Puerarin inhibited TRAF6/ROS-dependent activation of the MAPK and NF- $\kappa$ B signaling pathways in RANKL-induced RAW264.7 cells, and these effects were partially reversed by HO-1 silencing or TRAF6 overexpression. These findings suggest puerarin alleviates loss of bone mass in the OVX-model mice by suppressing osteoclastogenesis via inhibition of the TRAF6/ROS-dependent MAPK/NF- $\kappa$ B signaling pathway.

## INTRODUCTION

Osteoporosis is a progressively degenerative bone disease associated with aging and is characterized by reduced bone mass and structural deterioration of the bone tissue, resulting in weak and fragile bones with increased risk of fractures. The dysfunctional activities of the osteoblasts

and osteoclasts are the primary cause of osteoporosis [1]. In the postmenopausal women, estrogen deficiency causes osteoporosis because of excessive osteoclast activity resulting in reduced bone mass and decreased bone strength [2–4]. Hence, inhibition of osteoclast-induced bone resorption is the main therapeutic strategy for patients with osteopenia and osteoporosis.

Several studies have shown that osteoporosis is associated with increased oxidative stress [5, 6]. The serum antioxidant levels are significantly reduced in the patients with osteoporosis [7–10]. The levels of oxidative stress-related biomarkers are significantly higher and the antioxidant levels are significantly lower in the serum of postmenopausal women with osteoporosis. Furthermore, estrogen withdrawal weakens the bone defense mechanisms against oxidative stress and increases the risk of osteoporotic damage [11]. Osteoclasts are giant polykaryotic cells that are derived from the mononuclear macrophage lineage of the blood cells and are generated by the fusion of mononuclear progenitor cells [12]. Previous studies have shown that bone resorption activity of the osteoclasts is modulated by the reactive oxygen species (ROS) levels [13–16].

Puerarin is a major isoflavone glycoside extracted from the Chinese herb *Pueraria radix*. It has shown immense therapeutic potential for reducing blood pressure [17, 18], blood sugar [19, 20], blood lipids [21, 22], and cancer [23–25]. Puerarin decreases bone mass loss (osteopenia) in a concentration dependent manner by stimulating osteoprotegerin (OPG), which promotes osteogenic-specific transcription factors and inhibits Receptor Activator of Nuclear factor- $\kappa$ B (NF- $\kappa$ B) Ligand (RANKL)—a key promoter of osteoclastogenesis [26–28]. Several studies also show that puerarin inhibits osteoclastogenesis and bone resorption. For example, a recent study demonstrated that puerarin inhibits osteoclastogenesis by inhibiting RANKL-dependent and RANKL-independent autophagic responses [29]. However, the mechanism through which puerarin inhibits osteoclastogenesis and osteoporosis are unclear. Therefore, in this study, we investigated the mechanism through which puerarin inhibits osteoclastogenesis and osteoporosis using *in vitro* cell models and the *in vivo* ovariectomy (OVX)-induced osteoporosis model mice.

## RESULTS

### Puerarin protects against bone mass loss in the OVX mouse model

We performed 3D- $\mu$ CT analysis to evaluate the bone structural features in the sham, OVX and OVX+puerarin group mice. Overall, the results showed that bone mass loss was significantly higher in the OVX group mice compared to the sham group, but significantly reduced in the OVX+puerarin group (Figure 1A). As shown in Figure 1B–1G, the various bone structural parameters based on the 3D- $\mu$ CT analysis for the sham, OVX, and OVX+puerarin mice ( $n=5$ ) were as follows: BMD in  $g/cm^3$  ( $0.432\pm 0.017$  vs.

$0.372\pm 0.011$  vs.  $0.399\pm 0.006$ ), BV/TV in % ( $7.62\pm 1.22$  vs.  $3.74\pm 0.20$  vs.  $5.68\pm 0.22$ ), BS/BV in 1/mm ( $68.87\pm 4.14$  vs.  $50.13\pm 4.05$  vs.  $58.32\pm 1.60$ ), BS/TV in 1/mm ( $3.99\pm 0.49$  vs.  $1.70\pm 0.32$  vs.  $2.96\pm 0.12$ ), Conn.Dn in  $1/mm^2$  ( $60.90\pm 8.01$  vs.  $38.28\pm 4.66$  vs.  $49.90\pm 1.49$ ), Tb.N in 1/mm ( $0.86\pm 0.10$  vs.  $0.42\pm 0.04$  vs.  $0.71\pm 0.08$ ). H&E staining of the femur bone tissue sections from the sham, OVX and OVX+puerarin group mice confirmed that puerarin treatment decreased OVX-induced bone mass loss (Figure 1H). H&E staining results showed that the bone surface (BS) and bone volume (BV) were significantly reduced in the OVX group compared to the sham group, but were significantly higher in the OVX+puerarin group compared to the OVX group (Figure 1G and 1I). These results showed that puerarin significantly reduces bone mass loss in the OVX-induced osteoporosis model mice.

Several studies have implicated excessive activity of the osteoclasts in the pathogenesis related to osteoporosis. Therefore, we measured the effect of puerarin on the osteoclast numbers and function in the *in vivo* OVX-induced osteoporosis model mice. Tartrate resistant Acid Phosphatase (TRAcP) activity staining of the bone sections demonstrated that the numbers of osteoclasts in the bone tissues of the OVX+ puerarin group mice were significantly lower compared to those in the OVX group mice (Figure 2A). Puerarin treatment significantly reduced the numbers of osteoclasts and the surface area of the osteoclasts on the bone surface compared to the OVX group (Figure 2B). IHC analysis of bone resorption markers MMP9 and NFATc1 showed that the numbers of MMP9- and NFATc1-positive cells were significantly higher in the OVX group compared to the sham group, but were significantly reduced in the OVX+ puerarin group compared to the OVX group (Figure 2C–2E). Moreover, we did not observe any adverse events during the OVX procedure or puerarin treatment. The H&E staining of the liver and kidney tissues in the OVX+puerarin treated mice showed normal morphology (Supplementary Figure 1). Overall, these results demonstrate that puerarin reduces bone loss in the OVX-induced osteoporosis mice by suppressing the proliferation of TRAcP-positive osteoclasts and inhibiting the bone resorption activity of the osteoclasts.

### Puerarin reduces ROS levels in OVX-induced osteoporosis model mice

Osteoclast differentiation involves increased ROS levels and activation of redox signaling pathways [30]. Therefore, we investigated *in vivo* ROS levels by dihydroethidium (DHE) staining of the cryosectioned femur bone tissues from the three mouse groups. DHE

is a redox-sensitive fluorescent dye that is taken up by living cells and oxidized by superoxide anions to produce ethidium<sup>+</sup>, which binds to RNA and DNA to produce red fluorescence that can be estimated. ROS levels were significantly higher in the bone tissues of the OVX group mice compared to the sham group, but were reduced in the OVX+puerarin group (Figure 3A and 3B). Furthermore, IHC analysis showed that NOX1 (NADH oxidase 1; generates ROS or oxidative role) protein levels were higher and HO-1 (Heme Oxygenase 1; removes ROS or antioxidant role) protein levels were reduced in the bone tissues of the OVX group mice compared to the sham group, but, NOX1 levels were

reduced and HO-1 levels were increased in the bone tissues of the OVX+puerarin group mice (Figure 3C–3E). These data suggest that puerarin suppresses ROS levels in the OVX-induced osteoporosis mice by increasing levels of antioxidant enzymes such as HO-1 and decreasing levels of oxidant enzymes such as NOX-1.

### Puerarin inhibits *in vitro* osteoclast differentiation

CCK-8 assays demonstrated that treatment with 10 and 100  $\mu$ M puerarin did not reduce BMM viability (Figure 4A). The *in vitro* osteoclast differentiation was evaluated by treating BMMs with 50 ng/mL M-CSF and

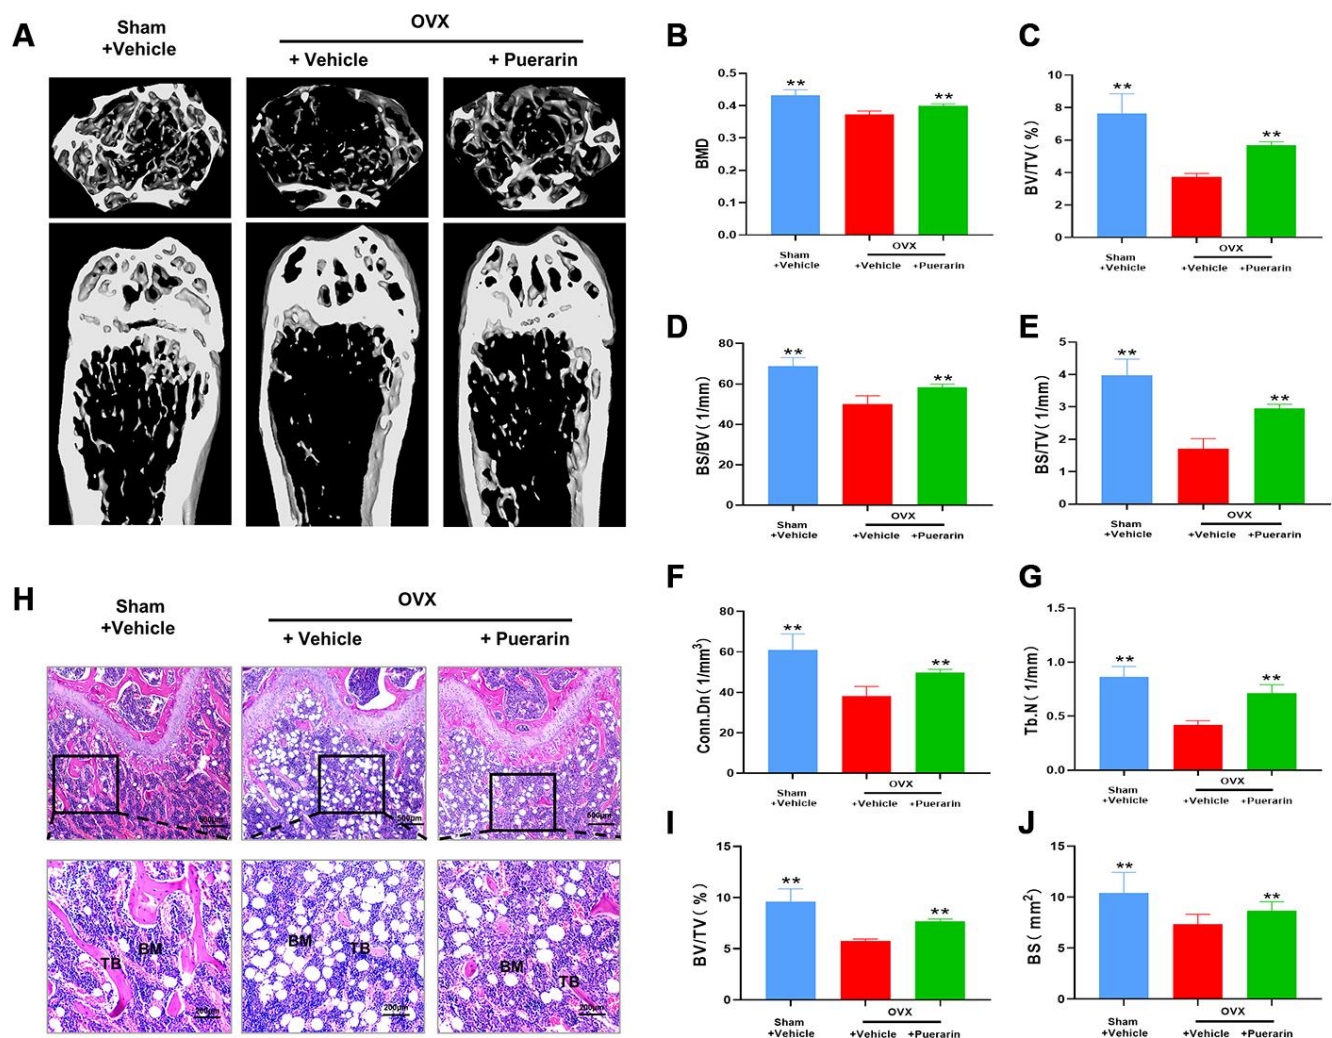

**Figure 1. Puerarin protects against bone mass loss in the *in vivo* OVX-induced osteoporosis model mice.** (A) Representative 3D- $\mu$ CT images of the femur bone in the sham, OVX+vehicle, and OVX+puerarin group mice. (B–G) Comparative analysis of the bone structural parameters such as bone mass density (BMD in  $\text{g}/\text{mm}^3$ ), ratio of bone volume to total volume (BV/TV in %), ratio of bone surface to bone volume (BS/BV in  $1/\text{mm}$ ), ratio of bone surface to total volume (BS/TV in  $1/\text{mm}$ ), connectivity density (Conn.Dn in  $1/\text{mm}^3$ ) and trabecular number (Tb.N in  $1/\text{mm}^2$ ) in the sham, OVX+vehicle, and OVX+puerarin group mice ( $n=5$  per group). Note: \*\* $P < 0.01$  vs. OVX+vehicle group. (H) Representative H&E stained femur bone sections of the sham, OVX+vehicle, and OVX+puerarin group mice ( $n=5$  per group). (I–J) The analysis of the bone parameters, BV/TV and BS based on the H&E staining sections of the femur bone from the sham, OVX+vehicle, and OVX+puerarin group mice ( $n=5$  per group). Note: \*\* $P < 0.01$  vs. the OVX+vehicle group.

50 ng/mL RANKL in the presence of 0, 10, and 100  $\mu$ M puerarin. The results showed that puerarin decreased the formation of multinucleated osteoclasts in a dose-dependent manner compared to the RANKL-induced group (Figure 4B–4C). Furthermore, the number of TRAcP-positive osteoclasts decreased when RANKL-induced BMMs were treated with 100  $\mu$ M puerarin on days 3-7 but had no effects when treated on days 1-3 (Figure 4D, 4E).

### Puerarin affects *in vitro* hydroxyapatite resorption by osteoclasts

We next analyzed the effects of puerarin on osteoclast resorptive activity using the hydroxyapatite resorption assay. The BMMs induced with 50 ng/mL M-CSF and 50 ng/mL RANKL generated numerous resorption pits,

but, puerarin treatment significantly reduced the numbers of osteoclasts and the resorption pits in a dose-dependent manner (Figure 5A). We observed resorption pits in nearly 73% of the hydroxyapatite surface area in the RANKL-induced group compared to 54% and 37% in the BMMs treated with 10 $\mu$ M and 100 $\mu$ M puerarin, respectively (Figure 5B). These results demonstrate that puerarin inhibits *in vitro* resorption activity of osteoclasts in a dose-dependent manner.

### Puerarin inhibits formation of the F-actin podosome ring on the surface of the osteoclasts and the expression of osteoclastogenesis-related genes

The sealing zone formed around the mature osteoclasts consists of a ring of filamentous actin (F-actin) with clear margins and this process is required for bone

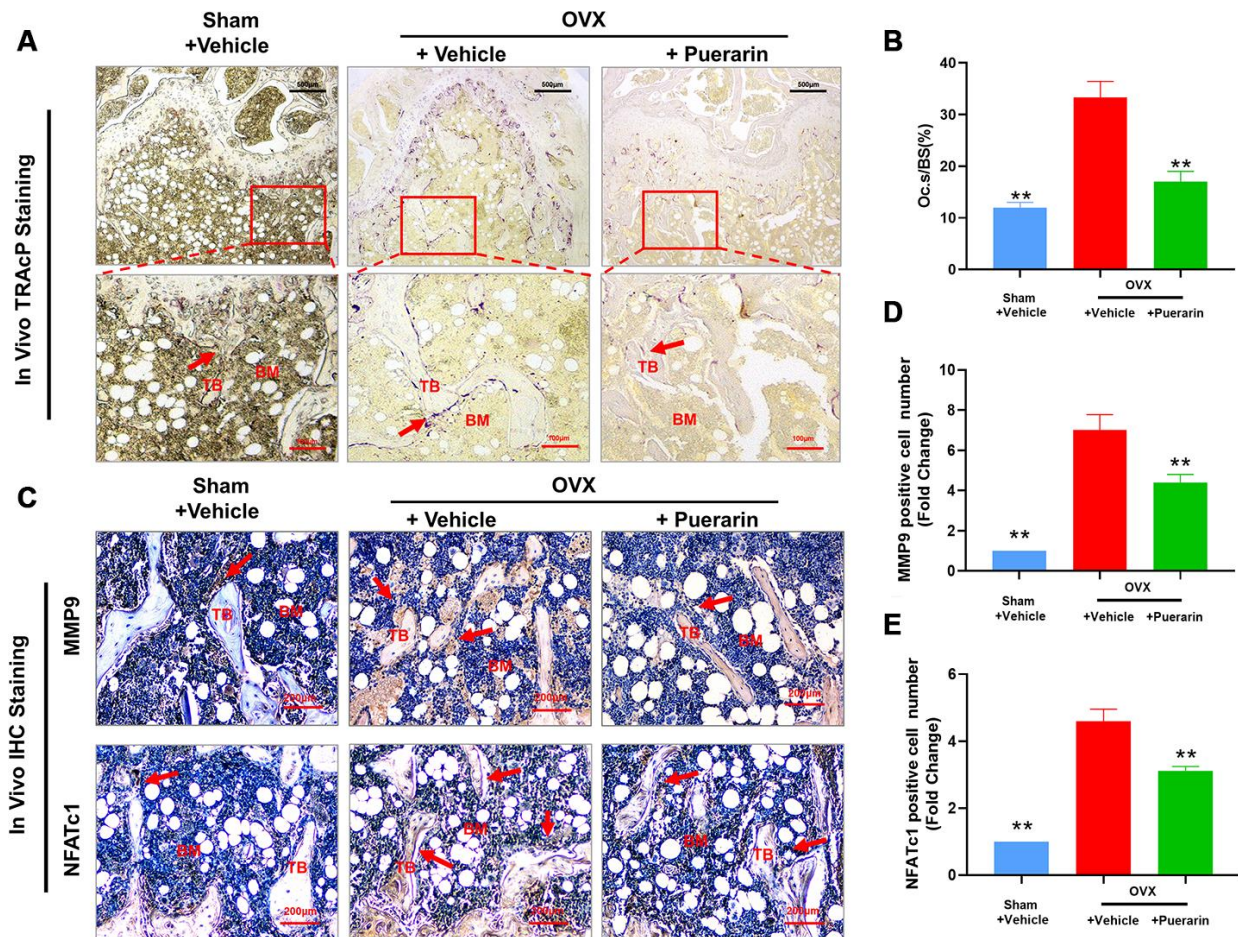

**Figure 2. Puerarin treatment reduces the numbers of osteoclasts in the bone tissue of OVX-induced osteoporosis model mice.** (A, B) Representative images show the tartrate-resistant acid phosphatase (TRAcP) activity staining in the bone sections from the sham, OVX+vehicle, and OVX+puerarin mice. Also shown is the estimation of the osteoclast surface relative to the bone surface (Oc.S/BS) in the femur bones of the sham, OVX+vehicle, and OVX+puerarin group mice (n=5 per group). Note: \*\* $P < 0.01$  vs. the OVX+vehicle group. (C–E) Representative images show the IHC staining of the femur bone sections from the sham, OVX+vehicle, and OVX+puerarin mice with antibodies against bone resorption markers, MMP9 and NFATc1. Also shown is the quantitative analysis of MMP9- and NFATc1-positive cells in the femur bone sections from the sham, OVX+vehicle, and OVX+puerarin mice (n=5 per group). Note: \*\* $P < 0.01$  vs. the OVX+vehicle group.

resorption [31]. Therefore, we analyzed the effects of puerarin on the F-actin ring formation and bone resorption by co-staining with phalloidin and antibodies against two critical osteoclastogenesis-specific proteins, MMP9 and NFATc1. The RANKL-induced BMMs showed well-defined F-actin sealing rings with intact nuclei and strongly positive MMP9 and NFATc1 expression, but, puerarin reduced the size of the rings, number of nuclei, and the expression of MMP9 and NFATc1 in a concentration-dependent manner (Figure 6A–6E).

Osteoclast differentiation is related to the expression levels of the osteoclast-specific genes such as NFATc1, MMP9, CTSK, Acp5 and c-Fos [32, 33]. QRT-PCR analysis showed that the relative mRNA expression of NFATc1, MMP9, CTSK, Acp5 and c-Fos was

significantly upregulated in the RANKL-induced BMMs, but significantly reduced by puerarin in a concentration-dependent manner (Figure 6F–6J). Collectively, these results demonstrate that puerarin inhibits *in vitro* osteoclastogenesis by suppressing the expression of specific osteoclast differentiation genes.

### Puerarin suppresses ROS levels by enhancing the expression of antioxidant enzymes

We then performed flow cytometry analysis to determine the effects of puerarin on intracellular ROS levels during RANKL-induced osteoclastogenesis using the ROS-sensitive dye, DCFH-DA. Puerarin reduced ROS levels in a dose-dependent manner in the RANKL-induced RAW264.7 cells (Figure 7A).

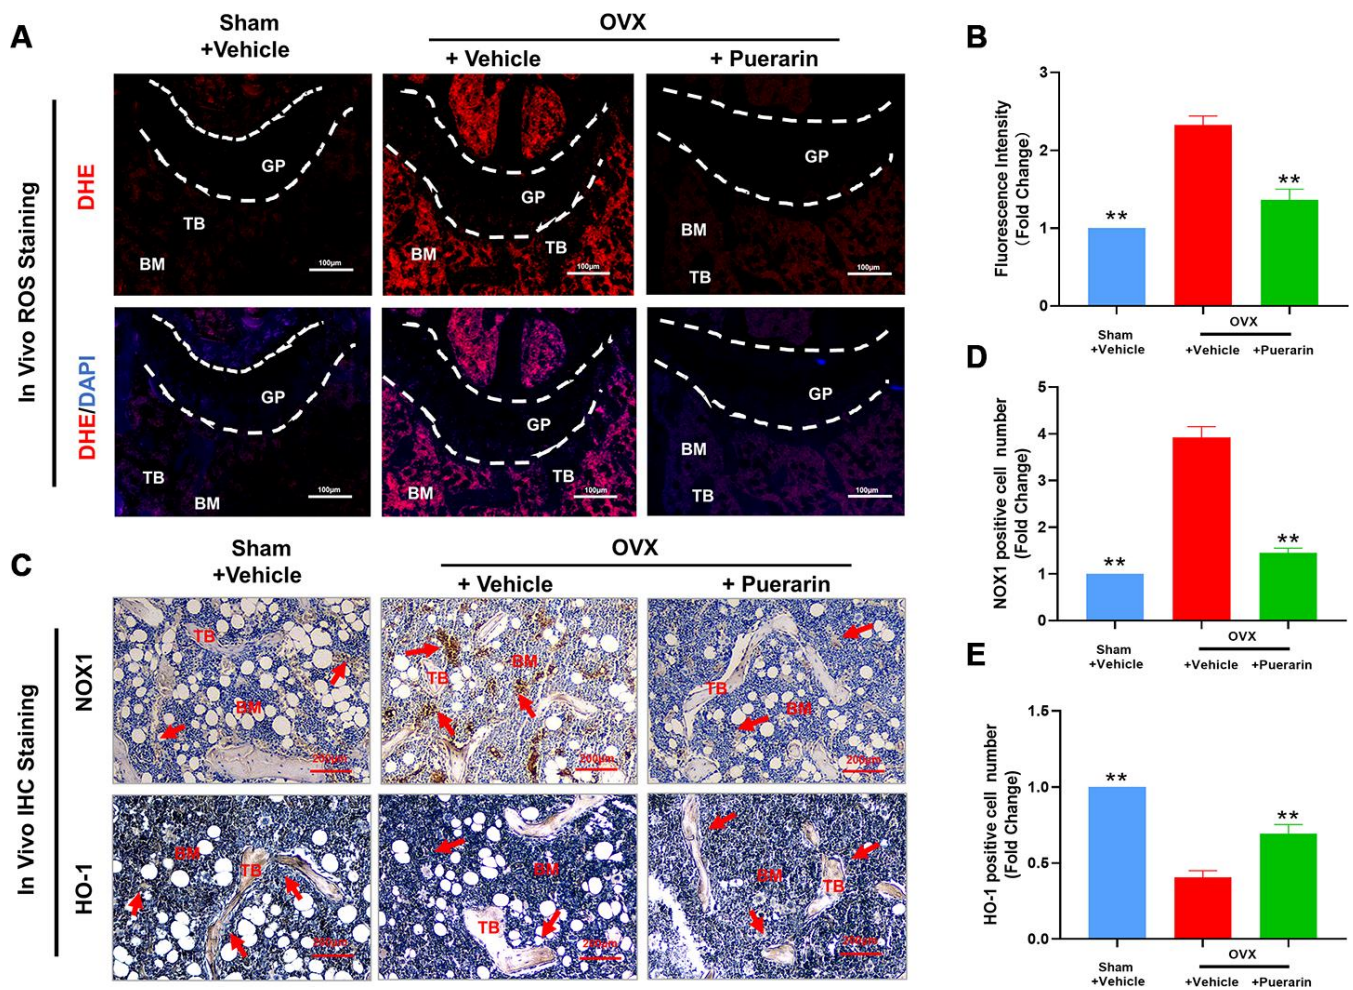

**Figure 3. Puerarin treatment reduces ROS levels in the bone tissues of the OVX-induced osteoporosis model mice.** (A, B) Fluorescence images show the ROS levels based on DHE staining in the cryosections of femur bone tissues from the sham, OVX+vehicle, and OVX+puerarin mice (n=5 per group). Note: \*\**P* <0.01 vs. the OVX+vehicle group. (C–E) Representative images show the IHC staining of the femur bone sections from the sham, OVX+vehicle, and OVX+puerarin mice with antibodies against NOX1 and HO-1. Also shown is the quantitative analysis of NOX1 and HO-1 expression in the bone sections from the sham, OVX+vehicle, and OVX+puerarin mice (n=5 per group). Note: \*\**P* <0.01 vs. the OVX+vehicle group.

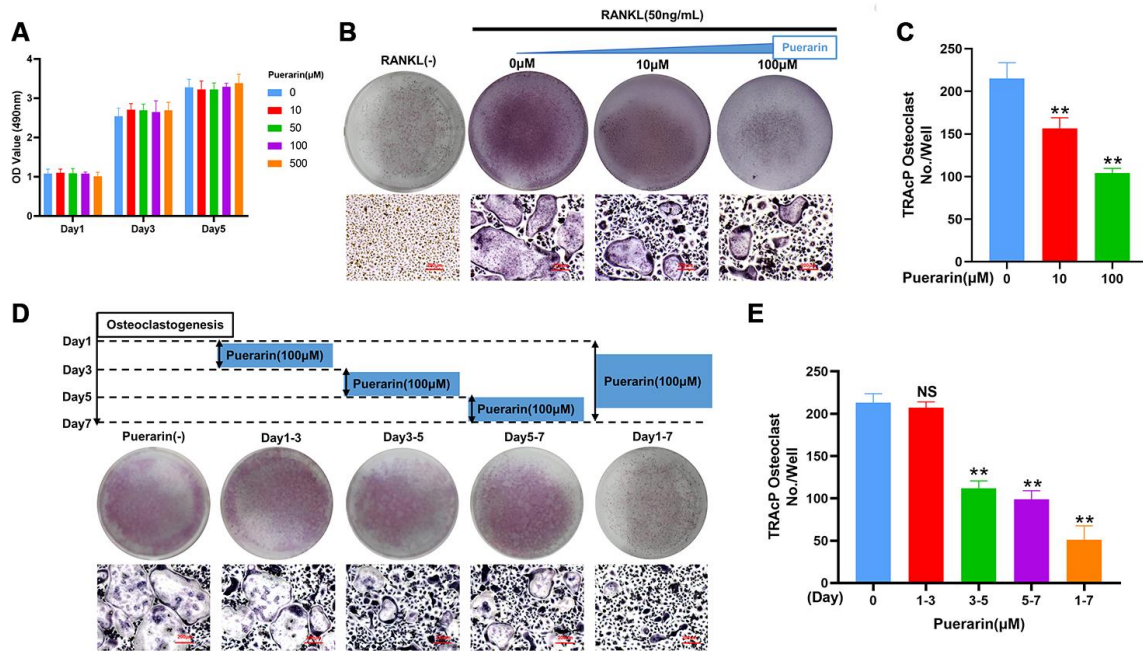

**Figure 4. Puerarin inhibits *in vitro* osteoclastogenesis.** (A) CCK-8 assay results show the viability of BMMs treated with 0, 10, 50, 100 and 500  $\mu$ M puerarin (n=5 per group). (B–C) TRAcP assay analysis shows the numbers of TRAcP-positive cells (>3 nuclei) in BMMs treated with 50 ng/mL M-CSF, 50 ng/mL RANKL, and 0, 10, or 100  $\mu$ M puerarin. Note: n=3 per group; \*\* $P$  <0.01 vs. the control group. (D, E) TRAcP assay analysis shows the numbers of TRAcP-positive cells in BMMs stimulated with 50 ng/mL M-CSF, 50 ng/mL RANKL and 100  $\mu$ M puerarin for the indicated days during osteoclastogenesis, Note: n=3 per group, NS: Not statistically significant, \*\* $P$  <0.01 vs. the control group (without puerarin treatment).

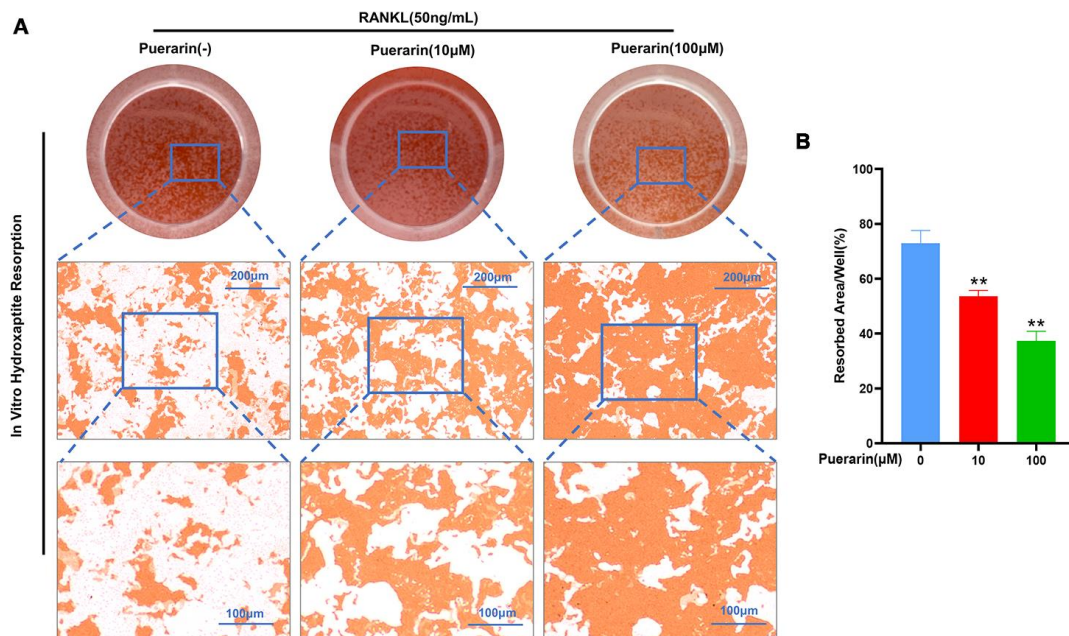

**Figure 5. Puerarin suppresses *in vitro* hydroxyapatite resorption activity of the osteoclasts.** (A) Representative images show the total numbers of osteoclasts and the resorption pits formed in the hydroxyapatite resorption assay in the BMMs treated with 50 ng/mL M-CSF, 50 ng/mL RANKL and 0, 10, or 100  $\mu$ M puerarin. (B) Hydroxyapatite resorption assay analysis shows the total resorbed hydroxyapatite area in the BMMs treated with 50 ng/mL M-CSF, 50 ng/mL RANKL and 0, 10, or 100  $\mu$ M puerarin. Note: n=3 per group; \*\* $P$  <0.01 vs. the control group (without puerarin treatment).

The NADPH oxidases (NOXs), namely, NOX1, NOX2 and NOX4, are important contributors of cellular ROS [34]. Moreover, the levels of antioxidant enzymes, glutathione disulfide reductase (GSR), HO-1, and catalase, play a crucial role in downregulating cellular ROS [35, 36]. Therefore, we analyzed the effects of puerarin on the levels of NOX1, GSR, HO-1 and catalase proteins during *in vitro* osteoclastogenesis. The NOX1 protein levels were significantly upregulated in the RANKL-induced RAW264.7 cells, but were reduced by puerarin in a dose-dependent manner (Figure 7B, 7C). Furthermore, GSR, HO-1 and catalase levels were reduced in the RANKL-induced RAW264.7 cells, but were upregulated by puerarin in a dose dependent manner (Figure 7G–7J).

Next, we analyzed the effects of puerarin on ROS signaling by lentiviral knockdown of HO-1 (Figure 8A and 8B) and overexpression of TRAF6 (Figure 8G and

8H) in the RAW264.7 cells. As shown in Supplementary Figure 2A, ROS levels were significantly reduced in the puerarin+RANKL-induced RAW264.7 cells compared to the RANKL-induced RAW264.7 cells, but, the effects of puerarin were abolished by HO-1 knockdown or TRAF6 overexpression. Furthermore, the levels of osteoclast differentiation-related proteins, c-Fos, MMP9 and CTSK were significantly downregulated in the puerarin+RANKL-induced RAW264.7 cells compared to the RANKL-induced RAW264.7 cells, but these effects were partially abrogated by HO-1 knockdown (Figure 8C–8F) and TRAF6 overexpression (Figure 8I, 8L). These results were further confirmed by the TRAcP staining and hydroxyapatite resorption assays (Supplementary Figure 2B–2E). Taken together, these results suggest that puerarin partly suppresses ROS production by inhibiting Nox1 and TRAF6 expression and increasing the levels of antioxidant enzymes such as HO-1.

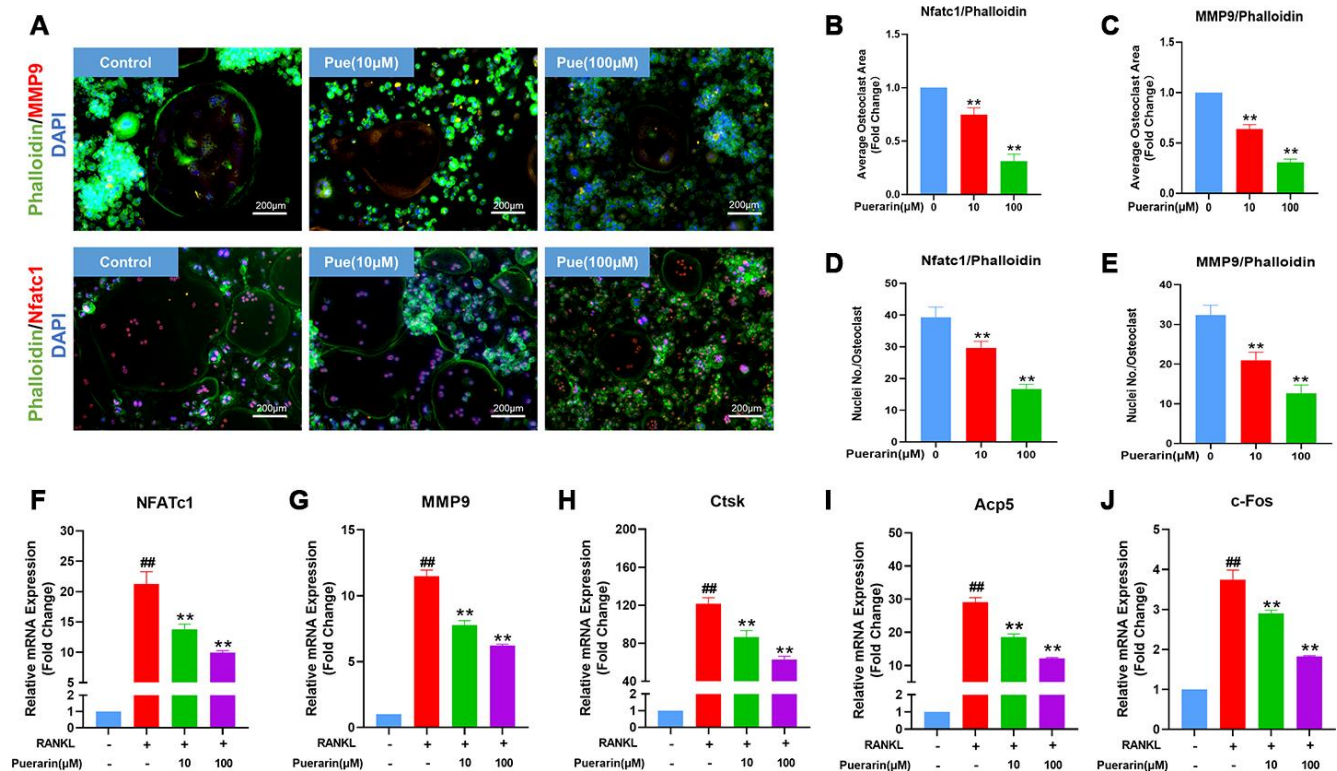

**Figure 6. Puerarin reduces F-actin ring formation in the osteoclasts and suppresses osteoclastogenesis-related gene expression.** (A) Representative images show the podosome belt formation in the osteoclasts formed from the RANKL and RANKL+ indicated concentrations of puerarin-treated BMMs. The cells were stained with antibodies against MMP9/NFATc1 (red), phalloidin for F-actin (green) and the nuclei were stained with DAPI (blue). (B, C) Quantitative analysis of the F-actin ring area in the osteoclasts from the RANKL and RANKL+ indicated concentrations of puerarin-treated BMMs. Note: n=3 per group, \*\*  $P < 0.01$  vs. the control group (without puerarin treatment). (D, E) Quantitative analysis of the numbers of nuclei per osteoclast in the control BMMs and BMMs induced the RANKL and RANKL+ indicated concentrations of puerarin-treated. Note: n=3 per group; \*\*  $P < 0.01$  vs. the control group (without puerarin treatment). (F–J) QRT-PCR analysis of the mRNA levels of osteoclastogenesis-related genes, NFATc1, MMP9, CTSK, Acp5, and c-Fos, in the control BMMs and BMMs induced with RANKL and RANKL+ indicated concentrations of puerarin. Note: n=3 per group; ##  $P < 0.01$  vs. the control group (without RANKL induce and puerarin treatment); \*\*  $P < 0.01$  vs. the RANKL-induced group (without puerarin treatment).

## Puerarin suppresses RANKL-induced osteoclastogenesis by inhibiting the NF- $\kappa$ B and MAPK signaling pathways

The binding of RANKL to its receptor, RANK recruits TRAF6 to its cytoplasmic domain and subsequently activates the MAPK and NF- $\kappa$ B signaling pathways, which then induce the expression of osteoclastogenesis genes [37]. The expression of the adaptor protein TRAF6 was significantly increased in the RANKL-induced RAW264.7 cells, but was reduced in the puerarin+ RANKL-induced RAW264.7 cells (Figure 7B and 7F). Next, we examined the effects of puerarin on the activation of NF- $\kappa$ B and MAPK signaling pathways. Western blotting analysis showed that phospho-NF- $\kappa$ B-p65 and phospho-I $\kappa$ B- $\alpha$  levels were significantly higher in the RANKL-treated RAW264.7 cells, whereas, puerarin treatment decreased the levels of phospho-NF- $\kappa$ B-p65 and further increased phospho-I $\kappa$ B- $\alpha$  levels (Figure 9A–9C). We then analyzed the phosphorylation

status of ERK, JNK and p38 MAP Kinases by western blotting. The phospho-ERK, phospho-JNK and phospho-p38 levels were significantly higher in the RANKL-induced RAW264.7 cells, but were reduced by puerarin in a time-dependent manner (Figure 9D–9G). These data suggest that puerarin inhibits osteoclast differentiation by suppressing TRAF6 expression and activation of the NF- $\kappa$ B and MAPK pathways.

## DISCUSSION

Osteoporosis is a progressive bone disease that affects a significant number of people worldwide, especially the aging populations, and is characterized by bone fragility and increased risk of fractures; it is associated with high morbidity, mortality, and health care costs [38, 39]. Postmenopausal osteoporosis typically occurs about 5-10 years after menopause because of decreasing estrogen levels [40, 41]. However, long-term preventive and curative medical care is not currently available.

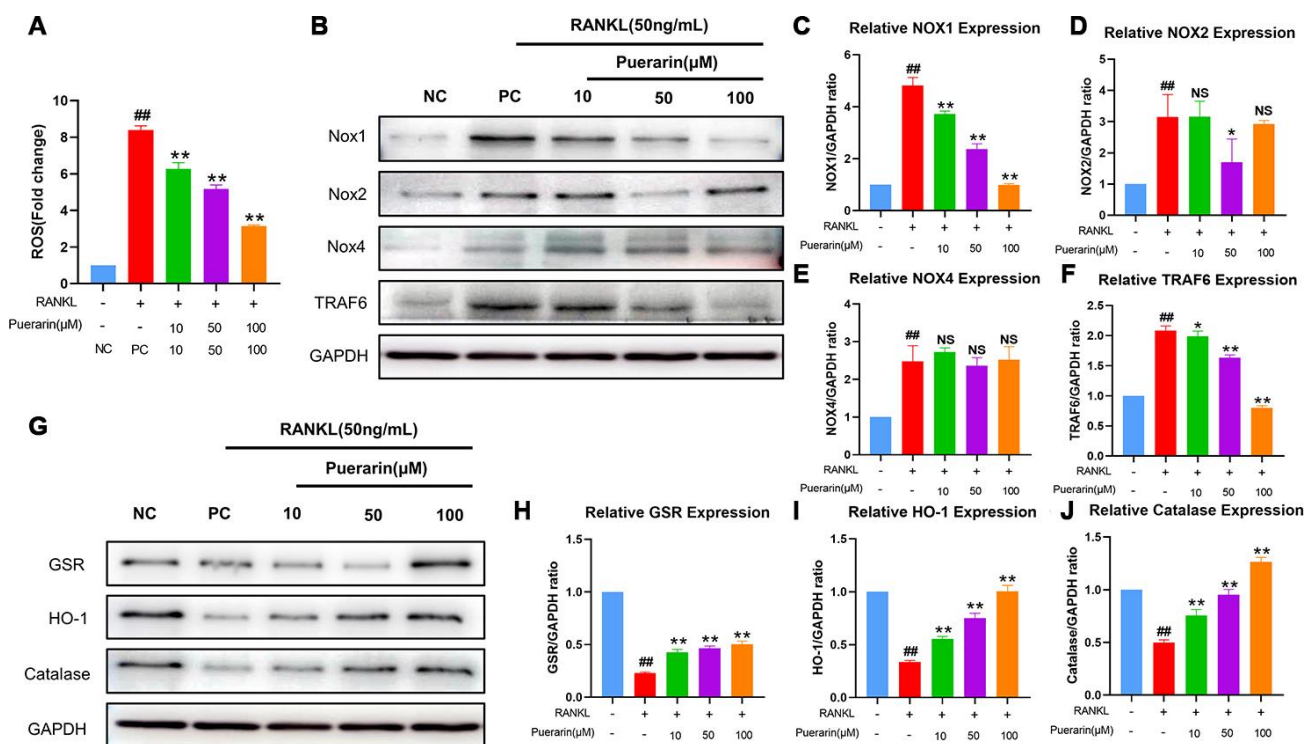

**Figure 7. Puerarin inhibits ROS by upregulating antioxidant enzymes in the RANKL-induced RAW264.7 cells.** (A) Flow cytometry analysis of ROS levels using DCFH2-DA in the untreated, RANKL-treated and indicated concentrations of puerarin+RANKL-treated RAW264.7 cells. Note: n=3 per group; <sup>###</sup>  $P < 0.01$  vs. the untreated group; <sup>\*\*</sup>  $P < 0.01$  vs. the RANKL-treated group. (B) Representative western blot images show the levels of NOX1/2/4 and TRAF6 proteins in the untreated, RANKL-induced and indicated concentrations of puerarin+RANKL treated RAW264.7 cells. (C–F) The histogram shows the relative levels of NOX1/2/4 and TRAF6 proteins in the untreated, RANKL- and RANKL+ indicated concentrations of puerarin-treated RAW264.7 cells. Note: n=3 per group; NS: Not statistically significant, <sup>###</sup>  $P < 0.01$  vs. the untreated group; <sup>\*</sup>  $P < 0.05$ , <sup>\*\*</sup>  $P < 0.01$  vs. the RANKL-induced group. (G) Representative western blot images show the levels of antioxidant enzymes, GSR, HO-1, and catalase in the untreated, RANKL- and RANKL+ indicated concentrations of puerarin-treated RAW264.7 cells. (H–J) The histogram shows the relative levels of GSR, HO-1 and catalase proteins in the untreated, RANKL- and RANKL+ indicated concentrations of puerarin-treated RAW264.7 cells. Note: n=3 per group; <sup>###</sup>  $P < 0.01$  vs. the untreated group; <sup>\*\*</sup>  $P < 0.01$  vs. the RANKL-induced group.



Estrogen is used primarily for the short-term prevention of osteoporosis but is not preferred for the long-term treatment because of side effects including cardiovascular problems and breast cancer risk [42]. Bisphosphonates are the most commonly used drugs for the prevention and treatment of osteoporosis, but their long-term use is not recommended because of side effects including muscle and joint pain due to unknown mechanisms and osteonecrosis of the jaw [43]. Teriparatide is a novel and promising drug to treat osteoporosis, but its use is limited to 18-24 months because of a high incidence of hypercalcemia [44]. Therefore, alternative and complementary long-term therapies with fewer side effects are urgently required for the treatment of clinical postmenopausal

osteoporosis. In this study, we demonstrate the potential benefits of puerarin for the treatment of clinical postmenopausal osteoporosis. We demonstrate that puerarin decreases bone mass loss by inhibiting osteoclast differentiation and activity through reduction of ROS levels and ROS-dependent MAPK and NF- $\kappa$ B signaling pathways in the OVX-induced osteoporosis model mice.

Oxidative stress plays a pivotal role in the pathogenesis of osteoporosis [32, 45, 46]. Osteoporosis involves imbalance between oxidation mechanisms that generate ROS and the antioxidant mechanisms that scavenge ROS. Hence, antioxidant therapy has been investigated as a viable therapy for patients with osteoporosis [47, 48].

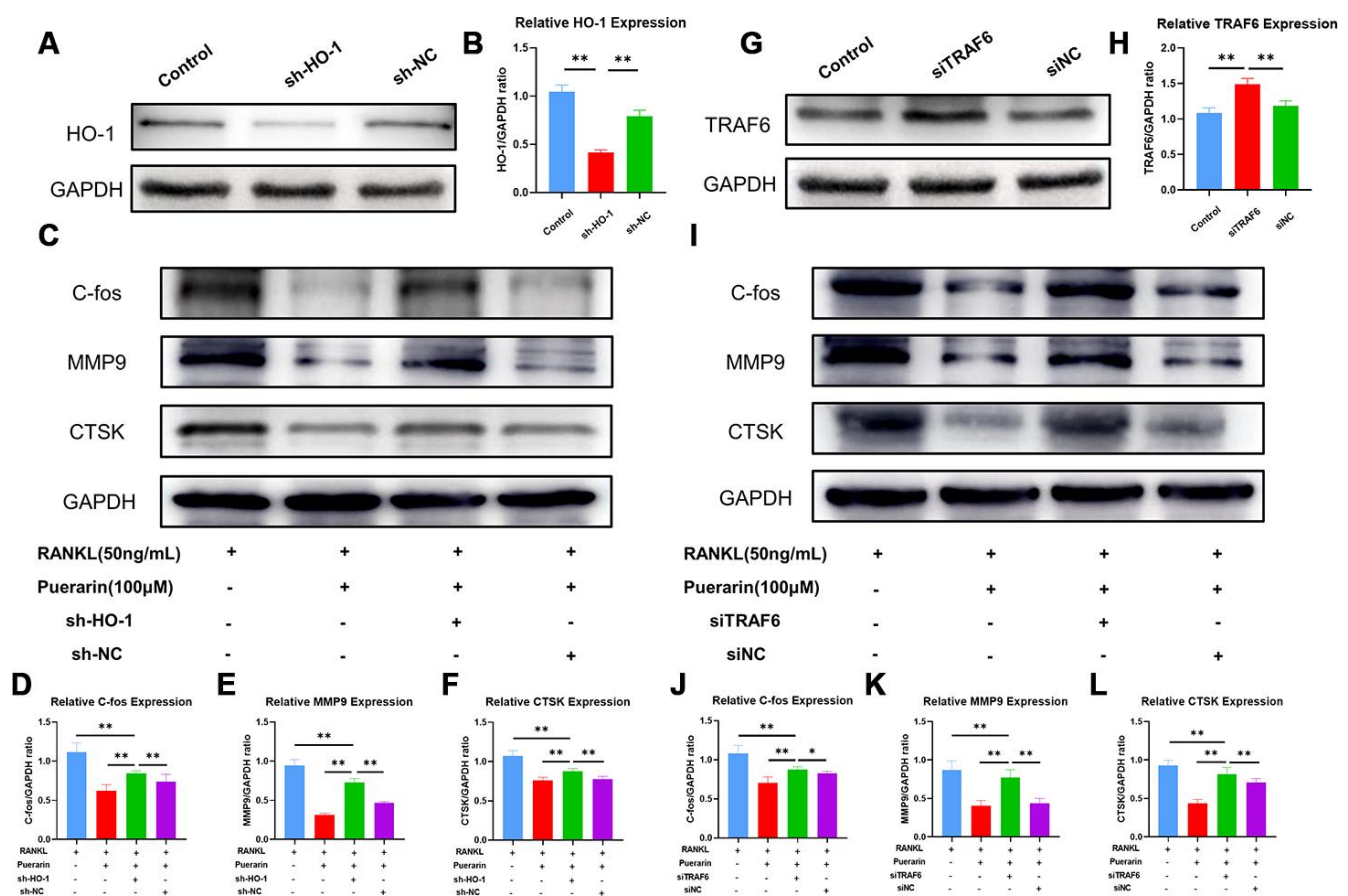

**Figure 8. Puerarin inhibits ROS levels by upregulating HO-1 and downregulating TRAF6.** (A) Representative western blot images show the HO-1 protein levels in the control and HO-1 knockdown RAW264.7 cells. (B) The histogram plots show the relative HO-1 levels in the control and HO-1 knockdown RAW264.7 cells. Note: n=3 per group; \*\**P* < 0.01. (C) Representative western blots show the levels of C-fos, MMP9 and CTSK in the control and HO-1 knockdown RAW264.7 cells treated with RANKL or RANKL+puerarin. (D–F) The histogram plots show the levels of C-fos, MMP9 and CTSK proteins in the control and HO-1 knockdown, RAW264.7 cells treated with RANKL or RANKL+puerarin. Note: n=3 per group, \*\**P* < 0.01. (G) Western blot analysis shows the TRAF6 protein levels in the control and TRAF6 overexpressing RAW264.7 cells. (H) The histogram plots show the relative TRAF6 protein levels in the control and TRAF6 overexpressing RAW264.7 cells. Note: n=3 per group; \*\**P* < 0.01. (I) Representative western blots show the levels of C-fos, MMP9 and CTSK in the control and TRAF6 overexpressing RAW264.7 cells treated with RANKL or RANKL+puerarin (J–L) The histogram plots show the levels of C-fos, MMP9 and CTSK proteins in the control and TRAF6 overexpressing RAW264.7 cells treated with RANKL or RANKL+puerarin. Note: n=3 per group; \**P* < 0.05, \*\**P* < 0.01.

However, there is no consensus on the clinically relevant oxidative stress-related biomarkers for osteoporosis. Direct estimation of ROS levels is difficult because of their instability and short half-life. Therefore, oxidative stress is generally assessed indirectly by measuring the activity of antioxidant enzymes [49–51]. Sendur et al. reported that the serum levels of antioxidant enzymes are higher in the postmenopausal women with osteoporosis [52]. In this study, we measured the *in vivo* levels of ROS levels using the fluorescent ROS-sensitive dye, DHE, which has been used to detect ROS levels in the dissected aorta and renal arteries [53]. *In vivo* DHE assay demonstrated that puerarin decreases ROS levels in the bone marrow of OVX-induced osteoporosis model mice. Furthermore, puerarin treatment significantly reduces loss of bone mass in the OVX-induced osteoporosis model mice. This suggests that puerarin inhibits oxidative stress and suppresses osteoclast differentiation and function.

Osteoclasts play a significant role in bone resorption and bone remodeling [54]. Hence, osteoclasts are considered as

therapeutic targets for bone-related diseases including osteoporosis. Bisphosphonates are drugs that inhibit the activity of osteoclasts and are commonly used to treat osteoporosis [55]. However, bisphosphonates are not effective in all individuals. Our study demonstrates that puerarin inhibits osteoclast differentiation and activity by reducing the ROS levels. Previous studies have shown that ROS play a key role in the differentiation and survival of osteoclasts. For example, Ha et al. demonstrated that RANKL stimulation induces ROS production and activates downstream signaling pathways that mediate osteoclastogenesis [56]. Our results show that puerarin suppresses differentiation of BMMs and RAW264.7 cells into osteoclasts by reducing the ROS levels.

Autophagy plays a crucial role in the intricately orchestrated process of osteoclastic differentiation [57]. Recently, Zhang et al showed that puerarin prevents RANKL-induced osteoclastogenesis by inhibiting RANKL-dependent autophagy [29]. In our study, we observed that RANKL stimulation upregulated autophagy, but puerarin reduced the expression of the

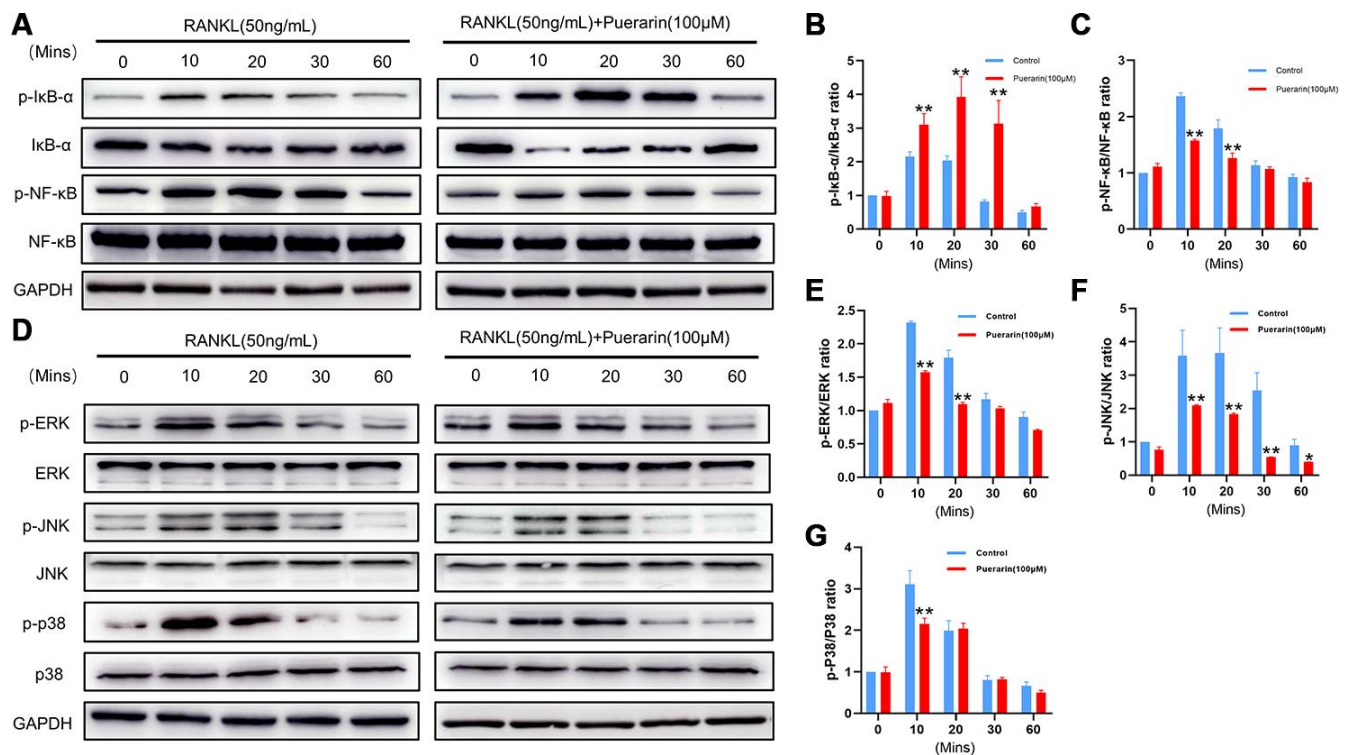

**Figure 9. Puerarin inhibits RANKL-induced osteoclast differentiation by suppressing the NF-κB and MAPK signaling pathways.** (A) Representative western blot images show the levels of p-IκBα, IκBα, NF-κB-p65, and p-NF-κB-p65 at 0, 10, 20, 30 and 60 mins in the RANKL- and RANKL+puerarin-treated RAW264.7 cells. (B–C) The histograms show the relative levels of p-IκBα and p-NF-κB proteins at 0, 10, 20, 30 and 60 min in the RANKL-, and RANKL+puerarin-treated RAW264.7 cells. Note: n=3 per group; \*P <0.05 \*\*P <0.01 vs. the RANKL-induced group. (D) Representative western blot images show the levels of ERK, p-ERK, JNK, p-JNK, P38 and p-P38 MAP kinases at 0, 10, 20, 30 and 60 min in the RANKL-, and RANKL+puerarin-treated RAW264.7 cells. (E–G) The histograms show the relative levels of the p-ERK, p-JNK, and p-p38 proteins at 0, 10, 20, 30 and 60 min in the RANKL-, and RANKL+puerarin-treated RAW264.7 cells. Note: n=3 per group, \*P <0.05, \*\*P <0.01 vs. the RANKL-induced group at the same time point.

autophagy protein, LC3B (Supplementary Figure 3D, 3E), and the autophagic vesicles as determined by MDC staining (Supplementary Figure 3C). These results demonstrate that puerarin reduces autophagy in the osteoclasts, thereby affecting their activity in osteoporosis.

Furthermore, we investigated the mechanism of osteoclast differentiation and function in regard to ROS and the NF- $\kappa$ B and MAPK pathways. RANKL induction increased the levels of intracellular ROS accompanied by the activation of NF- $\kappa$ B and MAPK signaling pathways, but these effects were significantly reduced by puerarin. Binding of RANKL to its receptor, RANK, recruits TRAF6, an adaptor molecule, which in turn activates MAPKs, NF- $\kappa$ B, and NFATc1 [58]. This cascade represents a key step in RANKL-induced osteoclast differentiation. The classic NF- $\kappa$ B pathway involves the phosphorylation and subsequent degradation of I $\kappa$ B $\alpha$ , which allows nuclear translocation of the p65 subunit of NF- $\kappa$ B and NF- $\kappa$ B-dependent gene expression. Furthermore, MAPK pathway activation involves the phosphorylation of p38, ERK1/2, and JNK. Several studies have demonstrated that the MAPK signaling pathway is involved in NF- $\kappa$ B activation [59–61]. While TRAF6 does not directly participate in ROS production, the dominant-mutant form of TRAF6 decreases intracellular ROS levels [58]. Zhou et al. reported that RANKL stimulation also increases the levels of intracellular ROS [62].

Furthermore, activation of ROS/MAPK/NF- $\kappa$ B signaling cascade plays a crucial role in hyperactivation of osteoclasts in osteoporosis [63]. Antioxidant enzymes also play a crucial role in modulating bone homeostasis and prevent osteoclast-mediated bone mass loss by reducing the ROS levels [64, 65]. In the present study, we demonstrate that puerarin treatment significantly reduces the ROS/MAPK/NF- $\kappa$ B signaling pathway, which is required for osteoclast differentiation and function.

Finally, this study has some limitations. Firstly, we demonstrate that puerarin inhibits osteoclastogenesis, both *in vivo* and *in vitro*, but, the osteoblasts also play a significant role in the bone homeostasis. We observe that puerarin promotes *in vitro* osteoblast differentiation (Supplementary Figure 4) by activating the p38 MAPK and downregulating the NF- $\kappa$ B signaling pathway in a dose-dependent manner (Supplementary Figure 5). However, the effects of puerarin on osteoblastogenesis and osteoporosis need further investigations. Secondly, in this study, we demonstrate the beneficial effects of puerarin in the OVX-induced osteoporosis model mice, but, its effects on other experimental osteoporosis models remains to be investigated. Thirdly, pathogenesis of osteoporosis involves immune dysfunction and systemic inflammation. However, the effects of puerarin are not known regarding these aspects. Hence, future investigations are required to discover the effects of puerarin on inflammation and osteoporosis.

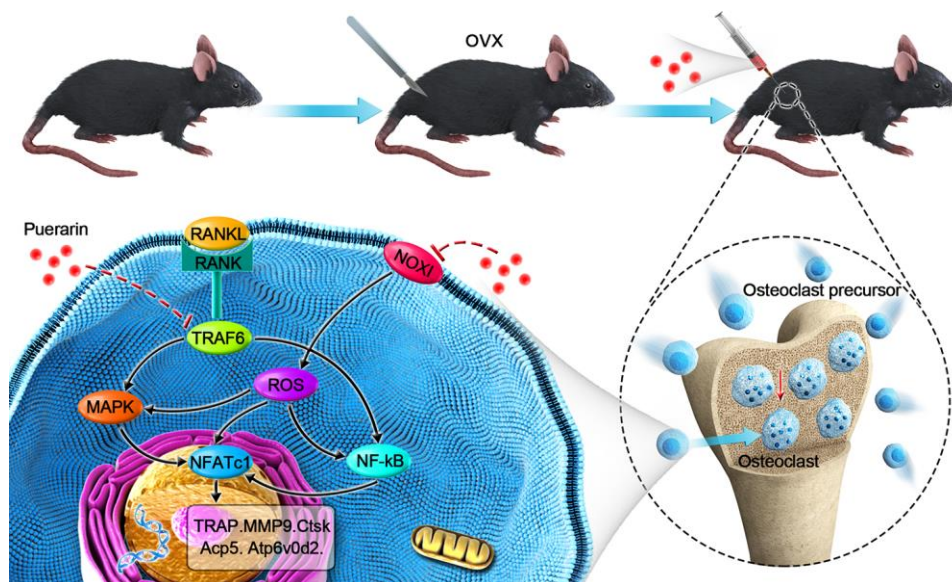

**Scheme 1. Schematic representation of the mechanism by which puerarin inhibits *in vivo* and *in vitro* osteoclastogenesis.** RANKL induces osteoclastogenesis by binding to its receptor, RANK, thereby inducing ROS and activating the NF- $\kappa$ B and MAPK pathways and increased NFATc1 expression. Subsequently, the expression of osteoclast-specific genes, Ctsk, Acp5, Atp6v0d2, and Mmp9 are upregulated. Our results show that puerarin inhibits osteoclastogenesis by inhibiting intracellular ROS levels by inhibiting NOX1 and enhancing antioxidant enzymes like HO-1, subsequently inhibits the activation of the MAPK and NF- $\kappa$ B signaling pathways.

In conclusion, our study shows that puerarin significantly decreases OVX-induced osteoporosis by suppressing osteoclastogenesis and oxidative stress in the bone tissues. Moreover, puerarin inhibits *in vivo* and *in vitro* osteoclast differentiation and activity by decreasing ROS levels and subsequent inhibition of ROS-induced MAPK and NF- $\kappa$ B signaling pathways (Scheme 1). Since puerarin has minimal effects on the breast epithelial cells [66], it is a potential candidate for the treatment of osteoclast-related osteoporosis in postmenopausal women.

## MATERIALS AND METHODS

### OVX-induced osteoporosis mouse model development and puerarin treatment

The animal experiments were performed according to the protocols approved by the Institutional Animal Care Committee, Zhangjiagang Traditional Chinese Medicine Hospital (approval number: 2018A011). Briefly, we purchased eleven-week-old C57BL/6J mice (JOINN Laboratories, Suzhou, China) and randomly divided into sham, OVX and OVX+puerarin groups (6 mice per group). We prepared a 10 mM Puerarin (Sigma-Aldrich, Sydney, Australia) stock solution in dimethylsulfoxide (DMSO; Thermo Fisher Scientific, Scoresby, Australia) and diluted puerarin before use in PBS (Thermo Fisher Scientific, Scoresby, Australia). Bilateral ovariectomy was carried out to induce osteoporosis under anesthesia for the mice in OVX and OVX+Puerarin groups, a sham procedure in which the ovaries were only exteriorized but not resected was performed on sham group mice. After one week of recovery, the mice in the OVX+puerarin group were administered with 100 mg puerarin per Kg body-weight through intraperitoneal injections every two days for six weeks before being sacrificed. The mice in the sham and OVX groups were injected intraperitoneally with 1% DMSO in PBS.

### Micro-CT scanning and analysis

The left femurs (n=6/groups) of the 3 groups of mice were analyzed using the SkyScan 1176 high-resolution micro-computed tomography scanner (SkyScan, Knotich, Belgium). The  $\mu$ CT images of the left femurs of the 3 groups of mice (n=6 per group) were obtained with a SkyScan 1176 high-resolution micro-computed tomography scanner (SkyScan, Knotich, Belgium). The scanning parameters were 9  $\mu$ m per layer, 80 kV (voltage) and 100 mA (current). Then, the relevant 3D-images were imported after processing into the CTAn software (Bruker micro-CT, Kontich, Belgium) and the parameters such as bone mass density (BMD), bone volume/tissue volume (BV/TV), bone surface/bone volume (BS/BV), bone surface/total volume (BS/TV),

trabecular number (Tb.N) and connectivity density (Conn.Dn) were measured.

### Histological and immunohistochemical analyses

After conducting the micro-CT analysis, the femurs were preserved at 4°C for histological and immunohistochemical analyses. The right femurs of the 3 groups of mice were first decalcified in 15% ethylenediaminetetraacetic acid (EDTA, Sigma), embedded in paraffin blocks, and sectioned at a thickness of 5  $\mu$ m using a microtome. Then, the sections were subjected to hematoxylin and eosin (H&E), tartrate-resistant acid phosphatase (TRAcP) and immunohistochemical (IHC) staining. The primary antibodies against MMP9 (ab38898, Abcam), NFATc1 (ab25916, Abcam), Heme Oxygenase 1 (HO-1; ab13243, Abcam) and NOX1 (ab55831, Abcam) were used for immunohistochemistry. The stained sections were photographed using a Optical Microscope Olympus CX43 (Tokyo, Japan). The histomorphometric analyses of the bones were performed using the BIOQUANT OSTEO software (Bioquant Image Analysis Corporation, Nashville, TN, USA).

### *In vivo* ROS detection by DHE staining

For *in vivo* ROS detection using dihydroethidium (DHE), the bone tissues were fixed in 4% paraformaldehyde for 4 h, and decalcified in EDTA overnight. Then, the samples were incubated in 20% sucrose and polyvinylpyrrolidone (Sigma, Australia) for 24 h, embedded and frozen in gelatin. The frozen bone tissues were then cryo-sectioned at a thickness of 5  $\mu$ m and air-dried before permeabilization in 0.3% Triton X-100 (Sigma, Australia) for 10 min. The nuclei were stained with DAPI. The stained sections were imaged using a Fluorescence Microscope Olympus CKX53 (Tokyo, Japan).

### *In vitro* culture and differentiation of bone marrow macrophages (BMM)

Fresh bone marrow macrophages (BMMs) were isolated from the femur and tibia of the female C57BL/6J mice. Briefly, total bone marrow cells were cultured in  $\alpha$ -MEM medium (GE Healthcare, Pittsburgh, USA) containing 10% FBS (Gibco, Rockville, USA) and 50 ng/mL M-CSF for 24 h. Then, the non-adherent BMMs were induced with 50 ng/mL M-CSF (R&D Systems, Minneapolis, MN, USA) and 50 ng/mL RANKL (R&D Systems, Minneapolis, MN, USA). The BMMs were treated with 0, 10 and 100  $\mu$ M puerarin. The concentration of DMSO in the working solution was less than 0.1%. The culture medium of the BMMs was replaced every two days.

### Cell counting kit-8 assay

The BMMs were seeded in 96-well plates at a density of  $1 \times 10^4$ /well for 24 h. The BMMs were then treated with 0, 10, 50, 100, or 500  $\mu$ M puerarin for 1, 3, or 5 days. Then, we incubated each well with 10  $\mu$ l CCK-8 reagent (Beyotime, Shanghai, China) for 1-2 h. Then, the optical density (OD) was measured at 450 nm using a microplate reader (BioTek, USA).

### In vitro TRAcP staining

The BMMs were seeded in the 24-well plates ( $1 \times 10^5$ /well), incubated with 50 ng/mL M-CSF, and 50 ng/mL RANKL and treated with 0, 10 or 100  $\mu$ M puerarin for 3 days. Then, the cells were washed twice for 15 min with PBS, fixed with paraformaldehyde, and analyzed using a TRAcP staining kit (Sigma, USA) according to the manufacturer's instructions. The osteoclasts (cells with more than three nuclei) were quantified using the Image J software (NIH, Bethesda, Maryland, USA).

### Hydroxyapatite resorption assay

We cultured  $1 \times 10^5$  BMMs per well in 24-well hydroxyapatite-coated plates (Corning Life Sciences, St. Lowell, MA, USA) and treated with 0, 10, or 100  $\mu$ M puerarin in  $\alpha$ -MEM medium containing with 50 ng/mL RANKL and 50 ng/mL M-CSF for 5 days. Then, the wells were washed with PBS to remove cells, and the areas of hydroxyapatite resorption was observed by a Optical Microscope Olympus CKX53 (Tokyo, Japan) and quantified with the Image J software (NIH, Bethesda, Maryland, USA).

### Immunofluorescence staining

For immunofluorescence staining, the differentiated osteoclasts were washed with PBS thrice and fixed with 4% paraformaldehyde for 30 mins and then permeabilized with Triton X-100 for 10 minutes. The cells were stained with the primary antibodies against MMP9 (1:1000, ab38898, Abcam), NFATc1 (1:1000, ab25916, Abcam) at 4°C overnight, then, washed and incubated with secondary Alexa Fluor 555 antibodies (1:1000) and Molecular Probes Alexa Fluor 488 Phalloidin (Cell Signaling Technology, Danvers, USA) for 1 h in dark. After the cells were stained with DAPI for 10 minutes, The cells were imaged using a fluorescence microscope. The osteoclast area and the number of nuclei per osteoclast were quantified using the Image J software.

### Flow cytometry analysis of intracellular ROS levels

The RAW264.7 cells were stimulated with 50 ng/mL RANKL and 0, 10, or 100  $\mu$ M puerarin for 30 mins.

Then, the cells were incubated with  $\alpha$ -MEM medium containing 10  $\mu$ M DCFH2-DA (Beyotime, Jiangsu, China) for 30 mins at 37°C in the dark according to the manufacturer's instructions. Then, after washing the cells thrice with  $\alpha$ -MEM, the cells were analyzed by flow cytometry (CytoFLEX Beckman, USA) and the proportions of positive cells in each group were calculated.

### Quantitative Real-time RT-PCR analysis

The RAW264.7 cells were purchased from the Cell Bank of the Chinese Academy of Sciences (Shanghai, China) and cultured in 6-well plates at a density of  $1 \times 10^5$ /well with medium containing 50ng/mL RANKL and 0, 10, or 100  $\mu$ M puerarin until osteoclasts were formed. Then total RNA was extracted from the osteoclasts using TRIzol (Ambion, USA). Equal amounts of total RNA was used for cDNA synthesis using a Reverse Transcription kit (Abm, Cat#G490 Canada). Then, real time quantitative PCR was performed using the SYBR Green PCR MasterMix (Applied Biosystems, Vilnius, Lithuania). The PCR cycling parameters were as follows: 94°C for 10 min, followed by 40 cycles of 95°C for 15 s and 60°C for 60 s. The primers (Sangon Biotech, Shanghai, China) used for qPCR were as follows: NFATc1-forward:5'-CAA CGCCCTGACCACCGATAG-3'; NFATc1-reverse:5'-GGCTGCCTTCCGTCTCATAGT-3'; MMP9-forward: 5'-CGTGTCTGGAGATTCGACTTGA-3', MMP9-reverse: 5'-TTGGAAACTCACACGCCAGA-3', Ctsk-forward: 5'-GGGAGAAAAACCTGAAGC-3', Ctsk-reverse: 5'-ATTCTGGGGACTCAGAGC-3', Acp5-forward: 5'-TGTGGCCATCTTTATGCT-3', Acp5-reverse: 5'-GTCATTTCTTTGGGGCTT-3', c-Fos-forward: 5'-GCGAGCAACTGAGAAGAC-3', c-Fos-reverse: 5'-TTGAAACCCGAGAACATC-3') and GAPDH-forward: 5'-GGTGAAGGTCGGTGTGAAC G-3', GAPDH-reverse: 5'-CTCGCTCCTGGAAGATG GTG-3'. Each sample was tested three times to ensure accuracy. The expression of NFATc1, MMP9, CTSK, Acp5 and cFos mRNAs was measured relative to GAPDH mRNA using the  $2^{-\Delta\Delta Ct}$  method.

### Lentiviral packaging and transfections

The lentiviruses carrying vectors with the mouse HO-1 and Traf6 genes were constructed and produced by OBiO Technology (Shanghai, China). The RAW264.7 cells were infected with the pSLenti-EF1a-EGFP-P2APuro-CMV Traf6-3Flag and pLKD-CMV EGFP-2A-Puro-U6-shRNA (Hmox1) at a MOI of 100 for 72 h following which stably transfected cell lines were obtained by culturing in medium containing puromycin according to the manufacturer's instructions.

## Western blotting

The RAW264.7 cells were cultured in 6-well plates at a density of  $1 \times 10^5$ /well and induced with 50 ng/mL RANKL in the presence or absence of different puerarin concentrations for different time lengths, as stated. Then, the total protein samples were extracted using RIPA buffer and quantified using the BCA protein assay. Equal amounts of protein samples were resolved on a 15% sodium dodecyl sulfate-polyacrylamide gel electrophoresis (SDS-PAGE) for 2 h and transferred onto a polyvinylidene fluoride (PVDF) membrane (Merck Millipore, USA). The membranes were blocked with 5% skimmed milk for 60 mins at room temperature. Then, the membranes were incubated overnight at 4°C with primary antibodies against NOX1 (1:1000, ab55831), NOX2 (1:1000, ab80508), NOX4 (1:1000, ab133303), TNF receptor associated factor 6 or TRAF6 (1:1000, ab227560), Catalase (1:500, ab76110), Heme Oxygenase 1 (HO-1 1:2000, ab13243), c-Fos, MMP9, CTSK, IκB-α (1:1000, ab32518), NF-κB (1:1000, ab16502), JNK (1:1000, ab179461), p-JNK (1:1000, ab32503), and p38 (1:1000, ab170099), which were all purchased from Abcam. The primary antibodies against ERK (1:1000, #4695), p-ERK (1:1000, #4377), p-IκB-α (1:1000, #2859), p-NF-κB (1:1000, #3031), p-p38 (1:1000, #4511), p-JNK (1:1000, #4668), and GAPDH (1:1000, #51332) were purchased from Cell Signaling Technology (CST). Then, the membranes were rinsed in Tris-buffered saline with Tween 20 (TBST) and incubated with the corresponding horseradish peroxidase-conjugated secondary antibodies (1:1000) for 2 h at room temperature. The blots were then developed using ECL (Millipore Corporation, Billerica, MA, USA) and then imaged and quantified using the Image J software.

## Statistical analysis

SPSS 25 software was used for statistical analysis in this experiment. All experiments were repeated at least three times independently. The data are shown as the means  $\pm$  standard deviation (SD), where SD denotes the differences between three independent experimental values. The data with normal distribution was analyzed using parametric tests and D'Agostino-Pearson omnibus test. For comparisons between multiple samples, one-way ANOVA and Tukey's test was used.  $P < 0.05$  was considered statistically significant.

## Abbreviations

Acp5: Acid phosphatase 5, tartrate resistant; BMD: Bone mass density; BMMs: bone marrow macrophages; BV/TV: bone volume per tissue volume; BS/BV: bone surface/bone volume; BS/TV: bone surface/total volume;

c-Fos: proto-oncogene C-Fos; CTSK: cathepsin K; CCK-8: Cell Counting Kit-8; Conn.Dn: connectivity density; DAPI: 4,6-diamidino-2-phenylindole; DCFH-DA: 2',7'-dichlorodihydrofluorescein diacetate; DHE: dihydroethidium; DMSO: Dimethylsulfoxide; DMEM: Dulbecco's Modified Eagle Medium; EDTA: Ethylenediaminetetraacetic acid; HO-1: Heme oxygenase-1; H&E: Hematoxylin and eosin; IκB-α: Inhibitor kappa B-alpha; IHC: Immunohistochemistry; MAPKs: Mitogen-activated protein kinases; M-CSF: Macrophage-Colony Stimulating Factor; MMP9: matrix metalloproteinase 9; NF-κB: Nuclear factor-κB; NOX: NADPH oxidase; NFATc1: Nuclear factor of activated T cells 1; OD: Optical density; OPG: Osteoprotegerin; OVX: Ovariectomized; PBS: phosphate buffered saline; PCR: Polymerase Chain Reaction; ROS: Reactive Oxygen Species; RANKL: Receptor Activator of Nuclear Factor-κB Ligand; Tb.N: trabecular number; Tb.Th: trabecular thickness; TRAcP: Tartrate Resistant Acid Phosphatase; TRAF6: TNF Receptor-Associated Factor 6; α-MEM: Alpha-modified Minimal Essential Medium.

## AUTHOR CONTRIBUTIONS

Zhirong Wang, Hong Li and Dechun Geng are corresponding authors who conceptualized, designed, and supervised the research project, and revised the manuscript; Long Xiao, Mengdan Zhong, Yu Huang, Jie Zhu and Wenkai Tang designed and performed *in vivo* and *in vitro* experiments, data analysis, manuscript writing and revisions; Danyong Li, Jiandong Shi and Aiqing Lu performed micro-CT, IHC and TRAP staining assays, data analysis and helped with the experimental methods and figures; Huilin Yang contributed to the experimental concept and design. Long Xiao and Mengdan Zhong contributed equally.

## CONFLICTS OF INTEREST

The authors declare that there are no conflicts of interest.

## FUNDING

This study was financially supported by grants from the National Nature Science Foundation of China (81873990, 81873991), the Natural Science Foundation of Jiangsu province (BK20180001 and BK20191201), Suzhou Science and Technology Development Plan Project (SYSD2017008, SYSD 2018001 and SYSD2018003), the Suzhou Science and Education Technology Project (KJXW2017061 and KJXW2018058), the Zhangjiagang Health System Youth Science and Technology Project (ZJGQNKJ201804, ZJGQNKJ201807) and the 2019 National Teacher System Training Project for Young Health Talents of Suzhou.

## REFERENCES

1. Cao X. Targeting osteoclast-osteoblast communication. *Nat Med*. 2011; 17:1344–46.  
<https://doi.org/10.1038/nm.2499> PMID:22064408
2. Herber CB, Krause WC, Wang L, Bayrer JR, Li A, Schmitz M, Fields A, Ford B, Zhang Z, Reid MS, Nomura DK, Nissenson RA, Correa SM, Ingraham HA. Estrogen signaling in arcuate Kiss1 neurons suppresses a sex-dependent female circuit promoting dense strong bones. *Nat Commun*. 2019; 10:163.  
<https://doi.org/10.1038/s41467-018-08046-4> PMID:30635563
3. Xiong J, Cawley K, Piemontese M, Fujiwara Y, Zhao H, Goellner JJ, O'Brien CA. Soluble RANKL contributes to osteoclast formation in adult mice but not ovariectomy-induced bone loss. *Nat Commun*. 2018; 9:2909.  
<https://doi.org/10.1038/s41467-018-05244-y> PMID:30046091
4. Almeida M, Laurent MR, Dubois V, Claessens F, O'Brien CA, Bouillon R, Vanderschueren D, Manolagas SC. Estrogens and androgens in skeletal physiology and pathophysiology. *Physiol Rev*. 2017; 97:135–87.  
<https://doi.org/10.1152/physrev.00033.2015> PMID:27807202
5. Kalyanaraman H, Schwaerzer G, Ramdani G, Castillo F, Scott BT, Dillmann W, Sah RL, Casteel DE, Pilz RB. Protein kinase G activation reverses oxidative stress and restores osteoblast function and bone formation in male mice with type 1 diabetes. *Diabetes*. 2018; 67:607–23.  
<https://doi.org/10.2337/db17-0965> PMID:29301852
6. Li L, Chen B, Zhu R, Li R, Tian Y, Liu C, Jia Q, Wang L, Tang J, Zhao D, Mo F, Liu Y, Li Y, et al. Fructus ligustri lucidi preserves bone quality through the regulation of gut microbiota diversity, oxidative stress, TMAO and Sirt6 levels in aging mice. *Aging (Albany NY)*. 2019; 11:9348–68.  
<https://doi.org/10.18632/aging.102376> PMID:31715585
7. He XF, Zhang L, Zhang CH, Zhao CR, Li H, Zhang LF, Tian GF, Guo MF, Dai Z, Sui FG. Berberine alleviates oxidative stress in rats with osteoporosis through receptor activator of NF- $\kappa$ B/receptor activator of NF- $\kappa$ B ligand/osteoprotegerin (RANK/RANKL/OPG) pathway. *Bosn J Basic Med Sci*. 2017; 17:295–301.  
<https://doi.org/10.17305/bjbm.2017.2596> PMID:29055350
8. Wang J, Wang G, Gong L, Sun G, Shi B, Bao H, Duan Y. Isoprosalen regulates PPAR- $\gamma$ /WNT to inhibit oxidative stress in osteoporosis. *Mol Med Rep*. 2018; 17:1125–31.  
<https://doi.org/10.3892/mmr.2017.7954> PMID:29115612
9. Pereira CS, Stringhetta-Garcia CT, da Silva Xavier L, Tirapeli KG, Pereira AA, Kayahara GM, Tamarim JM, Crivelini MM, Padovani KS, Leopoldino AM, Louzada MJ, Belló-Klein A, Llesuy SF, et al. Llex paraguariensis decreases oxidative stress in bone and mitigates the damage in rats during perimenopause. *Exp Gerontol*. 2017; 98:148–52.  
<https://doi.org/10.1016/j.exger.2017.07.006> PMID:28739429
10. Lin YJ, Chen CC, Chi NW, Nguyen T, Lu HY, Nguyen D, Lai PL, Sung HW. In situ self-assembling micellar depots that can actively trap and passively release NO with long-lasting activity to reverse osteoporosis. *Adv Mater*. 2018; 30:e1705605.  
<https://doi.org/10.1002/adma.201705605> PMID:29665153
11. Cervellati C, Bonaccorsi G, Cremonini E, Bergamini CM, Patella A, Castaldini C, Ferrazzini S, Capatti A, Picarelli V, Pansini FS, Massari L. Bone mass density selectively correlates with serum markers of oxidative damage in post-menopausal women. *Clin Chem Lab Med*. 2013; 51:333–38.  
<https://doi.org/10.1515/cclm-2012-0095> PMID:23089610
12. Miyamoto T, Suda T. Differentiation and function of osteoclasts. *Keio J Med*. 2003; 52:1–7.  
<https://doi.org/10.2302/kjm.52.1> PMID:12713016
13. Li M, Chen X, Yan J, Zhou L, Wang Y, He F, Lin J, Zhu C, Pan G, Yu J, Pei M, Yang H, Liu T. Inhibition of osteoclastogenesis by stem cell-derived extracellular matrix through modulation of intracellular reactive oxygen species. *Acta Biomater*. 2018; 71:118–31.  
<https://doi.org/10.1016/j.actbio.2018.03.003> PMID:29526830
14. Kim HS, Nam ST, Mun SH, Lee SK, Kim HW, Park YH, Kim B, Won KJ, Kim HR, Park YM, Kim HS, Beaven MA, Kim YM, Choi WS. DJ-1 controls bone homeostasis through the regulation of osteoclast differentiation. *Nat Commun*. 2017; 8:1519.  
<https://doi.org/10.1038/s41467-017-01527-y> PMID:29142196
15. Park H, Noh AL, Kang JH, Sim JS, Lee DS, Yim M. Peroxiredoxin II negatively regulates lipopolysaccharide-induced osteoclast formation and bone loss via JNK and STAT3. *Antioxid Redox Signal*. 2015; 22:63–77.  
<https://doi.org/10.1089/ars.2013.5748> PMID:25074339
16. Ng AY, Li Z, Jones MM, Yang S, Li C, Fu C, Tu C, Oursler MJ, Qu J, Yang S. Regulator of G protein signaling 12

- enhances osteoclastogenesis by suppressing Nrf2-dependent antioxidant proteins to promote the generation of reactive oxygen species. *Elife*. 2019; 8:e42951.  
<https://doi.org/10.7554/eLife.42951> PMID:31490121
17. Tan C, Wang A, Liu C, Li Y, Shi Y, Zhou MS. Puerarin improves vascular insulin resistance and cardiovascular remodeling in salt-sensitive hypertension. *Am J Chin Med*. 2017; 45:1169–84.  
<https://doi.org/10.1142/S0192415X17500641> PMID:28830209
  18. Shi W, Yuan R, Chen X, Xin Q, Wang Y, Shang X, Cong W, Chen K. Puerarin reduces blood pressure in spontaneously hypertensive rats by targeting eNOS. *Am J Chin Med*. 2019; 47:19–38.  
<https://doi.org/10.1142/S0192415X19500022> PMID:30612457
  19. Meezan E, Meezan EM, Jones K, Moore R, Barnes S, Prasain JK. Contrasting effects of puerarin and daidzin on glucose homeostasis in mice. *J Agric Food Chem*. 2005; 53:8760–67.  
<https://doi.org/10.1021/jf058105e> PMID:16248582
  20. Chen X, Yu J, Shi J. Management of diabetes mellitus with puerarin, a natural isoflavone from *pueraria lobata*. *Am J Chin Med*. 2018; 46:1771–89.  
<https://doi.org/10.1142/S0192415X18500891> PMID:30525896
  21. Liu CM, Ma JQ, Sun YZ. Protective role of puerarin on lead-induced alterations of the hepatic glutathione antioxidant system and hyperlipidemia in rats. *Food Chem Toxicol*. 2011; 49:3119–27.  
<https://doi.org/10.1016/j.fct.2011.09.007> PMID:22001170
  22. Zheng P, Ji G, Ma Z, Liu T, Xin L, Wu H, Liang X, Liu J. Therapeutic effect of puerarin on non-alcoholic rat fatty liver by improving leptin signal transduction through JAK2/STAT3 pathways. *Am J Chin Med*. 2009; 37:69–83.  
<https://doi.org/10.1142/S0192415X09006692> PMID:19222113
  23. Hien TT, Kim HG, Han EH, Kang KW, Jeong HG. Molecular mechanism of suppression of MDR1 by puerarin from *pueraria lobata* via NF-kappaB pathway and cAMP-responsive element transcriptional activity-dependent up-regulation of AMP-activated protein kinase in breast cancer MCF-7/adr cells. *Mol Nutr Food Res*. 2010; 54:918–28.  
<https://doi.org/10.1002/mnfr.200900146> PMID:20077420
  24. Deng XQ, Zhang HB, Wang GF, Xu D, Zhang WY, Wang QS, Cui YL. Colon-specific microspheres loaded with puerarin reduce tumorigenesis and metastasis in colitis-associated colorectal cancer. *Int J Pharm*. 2019; 570:118644.  
<https://doi.org/10.1016/j.ijpharm.2019.118644> PMID:31465837
  25. Wang Y, Ma Y, Zheng Y, Song J, Yang X, Bi C, Zhang D, Zhang Q. In vitro and in vivo anticancer activity of a novel puerarin nanosuspension against colon cancer, with high efficacy and low toxicity. *Int J Pharm*. 2013; 441:728–35.  
<https://doi.org/10.1016/j.ijpharm.2012.10.021> PMID:23089583
  26. Tiyasatkulkovit W, Charoenphandhu N, Wongdee K, Thongbunchoo J, Krishnamra N, Malaivijitnond S. Upregulation of osteoblastic differentiation marker mRNA expression in osteoblast-like UMR106 cells by puerarin and phytoestrogens from *pueraria mirifica*. *Phytomedicine*. 2012; 19:1147–55.  
<https://doi.org/10.1016/j.phymed.2012.07.010> PMID:22951392
  27. Tiyasatkulkovit W, Malaivijitnond S, Charoenphandhu N, Havill LM, Ford AL, VandeBerg JL. *Pueraria mirifica* extract and puerarin enhance proliferation and expression of alkaline phosphatase and type I collagen in primary baboon osteoblasts. *Phytomedicine*. 2014; 21:1498–503.  
<https://doi.org/10.1016/j.phymed.2014.06.019> PMID:25442257
  28. Shan Z, Cheng N, Huang R, Zhao B, Zhou Y. Puerarin promotes the proliferation and differentiation of MC3T3-E1 cells via microRNA-106b by targeting receptor activator of nuclear factor- $\kappa$ B ligand. *Exp Ther Med*. 2018; 15:55–60.  
<https://doi.org/10.3892/etm.2017.5405> PMID:29375675
  29. Zhang G, Wang Y, Tang G, Ma Y. Puerarin inhibits the osteoclastogenesis by inhibiting RANKL-dependent and -independent autophagic responses. *BMC Complement Altern Med*. 2019; 19:269.  
<https://doi.org/10.1186/s12906-019-2691-5> PMID:31615565
  30. Callaway DA, Jiang JX. Reactive oxygen species and oxidative stress in osteoclastogenesis, skeletal aging and bone diseases. *J Bone Miner Metab*. 2015; 33:359–70.  
<https://doi.org/10.1007/s00774-015-0656-4> PMID:25804315
  31. Hong S, Huh JE, Lee SY, Shim JK, Rhee SG, Jeong W. TRP14 inhibits osteoclast differentiation via its catalytic activity. *Mol Cell Biol*. 2014; 34:3515–24.  
<https://doi.org/10.1128/MCB.00293-14> PMID:25002534
  32. Chen K, Qiu P, Yuan Y, Zheng L, He J, Wang C, Guo Q, Kenny J, Liu Q, Zhao J, Chen J, Tickner J, Fan S, et al.



- Pseurotin a inhibits osteoclastogenesis and prevents ovariectomized-induced bone loss by suppressing reactive oxygen species. *Theranostics*. 2019; 9:1634–50.  
<https://doi.org/10.7150/thno.30206>  
 PMID:31037128
33. Xu W, Chen X, Wang Y, Fan B, Guo K, Yang C, Yu S, Pang Y, Zhang S. Chitooligosaccharide inhibits RANKL-induced osteoclastogenesis and ligation-induced periodontitis by suppressing MAPK/ c-fos/NFATc1 signaling. *J Cell Physiol*. 2020; 235:3022–32.  
<https://doi.org/10.1002/jcp.29207> PMID:31541460
  34. Miller AA, Drummond GR, Sobey CG. Novel isoforms of NADPH-oxidase in cerebral vascular control. *Pharmacol Ther*. 2006; 111:928–48.  
<https://doi.org/10.1016/j.pharmthera.2006.02.005>  
 PMID:16616784
  35. Hyeon S, Lee H, Yang Y, Jeong W. Nrf2 deficiency induces oxidative stress and promotes RANKL-induced osteoclast differentiation. *Free Radic Biol Med*. 2013; 65:789–99.  
<https://doi.org/10.1016/j.freeradbiomed.2013.08.005>  
 PMID:23954472
  36. Kanzaki H, Shinohara F, Kajiya M, Kodama T. The Keap1/Nrf2 protein axis plays a role in osteoclast differentiation by regulating intracellular reactive oxygen species signaling. *J Biol Chem*. 2013; 288:23009–20.  
<https://doi.org/10.1074/jbc.M113.478545>  
 PMID:23801334
  37. Lee NK, Choi YG, Baik JY, Han SY, Jeong DW, Bae YS, Kim N, Lee SY. A crucial role for reactive oxygen species in RANKL-induced osteoclast differentiation. *Blood*. 2005; 106:852–59.  
<https://doi.org/10.1182/blood-2004-09-3662>  
 PMID:15817678
  38. Compston JE, McClung MR, Leslie WD. Osteoporosis. *Lancet*. 2019; 393:364–76.  
[https://doi.org/10.1016/S0140-6736\(18\)32112-3](https://doi.org/10.1016/S0140-6736(18)32112-3)  
 PMID:30696576
  39. Edwards MH, Cooper C. Bone: the growing cost of fractures in Ireland. *Nat Rev Endocrinol*. 2012; 8:512–13.  
<https://doi.org/10.1038/nrendo.2012.131>  
 PMID:22825401
  40. Goyal L, Goyal T, Gupta ND. Osteoporosis and periodontitis in postmenopausal women: a systematic review. *J Midlife Health*. 2017; 8:151–58.  
[https://doi.org/10.4103/jmh.JMH\\_55\\_17](https://doi.org/10.4103/jmh.JMH_55_17)  
 PMID:29307975
  41. Black DM, Rosen CJ. Clinical practice. Postmenopausal osteoporosis. *N Engl J Med*. 2016; 374:254–62.  
<https://doi.org/10.1056/NEJMcp1513724>  
 PMID:26789873
  42. Rossouw JE, Anderson GL, Prentice RL, LaCroix AZ, Kooperberg C, Stefanick ML, Jackson RD, Beresford SA, Howard BV, Johnson KC, Kotchen JM, Ockene J, and Writing Group for the Women’s Health Initiative Investigators. Risks and benefits of estrogen plus progestin in healthy postmenopausal women: principal results from the women’s health initiative randomized controlled trial. *JAMA*. 2002; 288:321–33.  
<https://doi.org/10.1001/jama.288.3.321>  
 PMID:12117397
  43. Khosla S, Burr D, Cauley J, Dempster DW, Ebeling PR, Felsenberg D, Gagel RF, Gilsanz V, Guise T, Koka S, McCauley LK, McGowan J, McKee MD, et al, and American Society for Bone and Mineral Research. Bisphosphonate-associated osteonecrosis of the jaw: report of a task force of the American society for bone and mineral research. *J Bone Miner Res*. 2007; 22:1479–91.  
<https://doi.org/10.1359/jbmr.0707onj>  
 PMID:17663640
  44. Neer RM, Arnaud CD, Zanchetta JR, Prince R, Gaich GA, Reginster JY, Hodsman AB, Eriksen EF, Ish-Shalom S, Genant HK, Wang O, Mitlak BH. Effect of parathyroid hormone (1-34) on fractures and bone mineral density in postmenopausal women with osteoporosis. *N Engl J Med*. 2001; 344:1434–41.  
<https://doi.org/10.1056/NEJM200105103441904>  
 PMID:11346808
  45. Almeida M, O’Brien CA. Basic biology of skeletal aging: role of stress response pathways. *J Gerontol A Biol Sci Med Sci*. 2013; 68:1197–208.  
<https://doi.org/10.1093/gerona/glt079>  
 PMID:23825036
  46. Bhattarai G, Poudel SB, Kook SH, Lee JC. Resveratrol prevents alveolar bone loss in an experimental rat model of periodontitis. *Acta Biomater*. 2016; 29:398–408.  
<https://doi.org/10.1016/j.actbio.2015.10.031>  
 PMID:26497626
  47. Zhou Q, Zhu L, Zhang D, Li N, Li Q, Dai P, Mao Y, Li X, Ma J, Huang S. Oxidative stress-related biomarkers in postmenopausal osteoporosis: a systematic review and meta-analyses. *Dis Markers*. 2016; 2016:7067984.  
<https://doi.org/10.1155/2016/7067984>  
 PMID:27594735
  48. Ma Q, Liang M, Tang X, Luo F, Dou C. Vitamin B5 inhibit RANKL induced osteoclastogenesis and ovariectomy induced osteoporosis by scavenging ROS generation. *Am J Transl Res*. 2019; 11:5008–18.  
 PMID:31497217

49. Akar İ, Ince İ, Aslan C, Benli İ, Demir O, Altindeger N, Dogan A, Ceber M. Oxidative stress and prolidase enzyme activity in the pathogenesis of primary varicose veins. *Vascular*. 2018; 26:315–21. <https://doi.org/10.1177/1708538117741764> PMID:29216795
50. Thiab NR, King N, Jones GL. Effect of ageing and oxidative stress on antioxidant enzyme activity in different regions of the rat kidney. *Mol Cell Biochem*. 2015; 408:253–60. <https://doi.org/10.1007/s11010-015-2503-2> PMID:26169983
51. Ali A, Rashid MA, Huang QY, Lei CL. Influence of UV-a radiation on oxidative stress and antioxidant enzymes in *mythimna separata* (lepidoptera: noctuidae). *Environ Sci Pollut Res Int*. 2017; 24:8392–98. <https://doi.org/10.1007/s11356-017-8514-7> PMID:28185177
52. Sendur OF, Turan Y, Tastaban E, Serter M. Antioxidant status in patients with osteoporosis: a controlled study. *Joint Bone Spine*. 2009; 76:514–18. <https://doi.org/10.1016/j.jbspin.2009.02.005> PMID:19464221
53. Capasso G, Di Gennaro CI, Della Ragione F, Manna C, Ciarcia R, Florio S, Perna A, Pollastro RM, Damiano S, Mazzoni O, Galletti P, Zappia V. In vivo effect of the natural antioxidant hydroxytyrosol on cyclosporine nephrotoxicity in rats. *Nephrol Dial Transplant*. 2008; 23:1186–95. <https://doi.org/10.1093/ndt/gfm784> PMID:18057067
54. Kylmaoja E, Nakamura M, Tuukkanen J. Osteoclasts and remodeling based bone formation. *Curr Stem Cell Res Ther*. 2016; 11:626–33. <https://doi.org/10.2174/1574888x10666151019115724> PMID:26477623
55. Russell RG, Rogers MJ. Bisphosphonates: from the laboratory to the clinic and back again. *Bone*. 1999; 25:97–106. [https://doi.org/10.1016/s8756-3282\(99\)00116-7](https://doi.org/10.1016/s8756-3282(99)00116-7) PMID:10423031
56. Ha H, Kwak HB, Lee SW, Jin HM, Kim HM, Kim HH, Lee ZH. Reactive oxygen species mediate RANK signaling in osteoclasts. *Exp Cell Res*. 2004; 301:119–27. <https://doi.org/10.1016/j.yexcr.2004.07.035> PMID:15530848
57. Valenti MT, Dalle Carbonare L, Mottes M. Role of autophagy in bone and muscle biology. *World J Stem Cells*. 2016; 8:396–98. <https://doi.org/10.4252/wjsc.v8.i12.396> PMID:28074123
58. Agidigbi TS, Kim C. Reactive oxygen species in osteoclast differentiation and possible pharmaceutical targets of ROS-mediated osteoclast diseases. *Int J Mol Sci*. 2019; 20:3576. <https://doi.org/10.3390/ijms20143576> PMID:31336616
59. Lan J, Dou X, Li J, Yang Y, Xue C, Wang C, Gao N, Shan A. L-arginine ameliorates lipopolysaccharide-induced intestinal inflammation through inhibiting the TLR4/NF-κB and MAPK pathways and stimulating β-defensin expression in vivo and in vitro. *J Agric Food Chem*. 2020; 68:2648–63. <https://doi.org/10.1021/acs.jafc.9b07611> PMID:32064872
60. Huang WC, Tsai TH, Huang CJ, Li YY, Chyuan JH, Chuang LT, Tsai PJ. Inhibitory effects of wild bitter melon leaf extract on propionibacterium acnes-induced skin inflammation in mice and cytokine production in vitro. *Food Funct*. 2015; 6:2550–60. <https://doi.org/10.1039/c5fo00550g> PMID:26098998
61. Tsumagari K, Abd Elmageed ZY, Sholl AB, Friedlander P, Abdraboh M, Xing M, Boulares AH, Kandil E. Simultaneous suppression of the MAP kinase and NF-κB pathways provides a robust therapeutic potential for thyroid cancer. *Cancer Lett*. 2015; 368:46–53. <https://doi.org/10.1016/j.canlet.2015.07.011> PMID:26208433
62. Zhou F, Mei J, Yuan K, Han X, Qiao H, Tang T. Isorhamnetin attenuates osteoarthritis by inhibiting osteoclastogenesis and protecting chondrocytes through modulating reactive oxygen species homeostasis. *J Cell Mol Med*. 2019; 23:4395–407. <https://doi.org/10.1111/jcmm.14333> PMID:30983153
63. An Y, Zhang H, Wang C, Jiao F, Xu H, Wang X, Luan W, Ma F, Ni L, Tang X, Liu M, Guo W, Yu L. Activation of ROS/MAPKs/NF-κB/NLRP3 and inhibition of efferocytosis in osteoclast-mediated diabetic osteoporosis. *FASEB J*. 2019; 33:12515–27. <https://doi.org/10.1096/fj.201802805RR> PMID:31461386
64. Schröder K. NADPH oxidases in bone homeostasis and osteoporosis. *Free Radic Biol Med*. 2019; 132:67–72. <https://doi.org/10.1016/j.freeradbiomed.2018.08.036> PMID:30189265
65. Martín-Pardillos A, Tsaalbi-Shtylik A, Chen S, Lazare S, van Os RP, Dethmers-Ausema A, Fakouri NB, Bosshard M, Aprigliano R, van Loon B, Salvatori DC, Hashimoto K, Dingemans-van der Spek C, et al. Genomic and functional integrity of the hematopoietic system requires tolerance of oxidative DNA lesions. *Blood*. 2017; 130:1523–34. <https://doi.org/10.1182/blood-2017-01-764274> PMID:28827409

66. Wang Y, Wang WL, Xie WL, Li LZ, Sun J, Sun WJ, Gong HY. Puerarin stimulates proliferation and differentiation and protects against cell death in human osteoblastic MG-63 cells via ER-dependent MEK/ERK and PI3K/Akt activation. *Phytomedicine*. 2013; 20:787–96.  
<https://doi.org/10.1016/j.phymed.2013.03.005>  
PMID:[23639192](https://pubmed.ncbi.nlm.nih.gov/23639192/)

## SUPPLEMENTARY MATERIALS

### Supplementary Methods

#### Cell culture

MC3T3-E1 cells were cultured in  $\alpha$ -MEM (HyClone, Logan, UT, USA) medium containing 10% fetal bovine serum and 1% penicillin-streptomycin at 5% CO<sub>2</sub> and 37°C. To induce the differentiation of MC3T3-E1 cells, the cells were cultured in osteogenic differentiation medium that included Dulbecco's modified Eagle medium (DMEM) containing 10% bovine serum, 100  $\mu$ g/mL streptomycin, 100 U/mL penicillin, 50  $\mu$ g/mL L-ascorbic acid, 100 nM dexamethasone, and 10 mM  $\beta$ -glycerol phosphate. We purchased hydrogen peroxide (H<sub>2</sub>O<sub>2</sub>) and Puerarin from Sigma (St. Louis, MO, USA). For treatments, the cells were classified into four experimental groups: (1) control group: cells treated only with  $\alpha$ -MEM medium; (2) H<sub>2</sub>O<sub>2</sub> group: cells treated with  $\alpha$ -MEM containing 400  $\mu$ M H<sub>2</sub>O<sub>2</sub>; (3) low-dose puerarin group: cells treated with  $\alpha$ -MEM containing 400  $\mu$ M H<sub>2</sub>O<sub>2</sub> and 10  $\mu$ M puerarin; and (4) high-dose puerarin group: cells treated with  $\alpha$ -MEM containing 400  $\mu$ M H<sub>2</sub>O<sub>2</sub> and 100  $\mu$ M puerarin.

#### ALP staining

After two weeks of culture in osteogenic medium, MC3T3-E1 cells were assayed for alkaline phosphatase (ALP) activity. Briefly, the MC3T3-E1 cells were washed thrice with PBS and fixed with 4% paraformaldehyde for

15 mins. Then, the cells were washed thrice with PBS and incubated with the BCIP/NBT working solution (Beyotime Biotech, Jiangsu, China) in the dark for 20 mins. The staining was observed and photographed under a light microscope.

#### Alizarin red S staining

After three weeks of culture in osteogenic medium, MC3T3-E1 cells were stained with Alizarin red S (ARS). Briefly, the MC3T3-E1 cells were washed three times with PBS and fixed with 4% paraformaldehyde for 20 min at 4 °C. Then, the cells were rinsed and incubated with the ARS staining solution (pH 4.2; Cyagen Biosciences, Santa Clara, CA, USA) for 20 min. Finally, the cells were washed in ddH<sub>2</sub>O thrice and imaged under a light microscope.

#### MDC staining

To determine the presence of autophagic vesicles in the osteoclast cells, RAW264.7 cells were grown on the cover slips in a 6-well plate and induced to differentiate into osteoclasts with or without RANKL in the presence or absence of puerarin and H<sub>2</sub>O<sub>2</sub>. During the course of differentiation, a subset of cells on day 2 were incubated with 50 mM MDC (Beyotime Biotech, Jiangsu, China) at 37°C for 15 min and then washed with PBS. Finally, the cells were mounted on a glass slide and imaged using a fluorescence microscope.

## Supplementary Figures

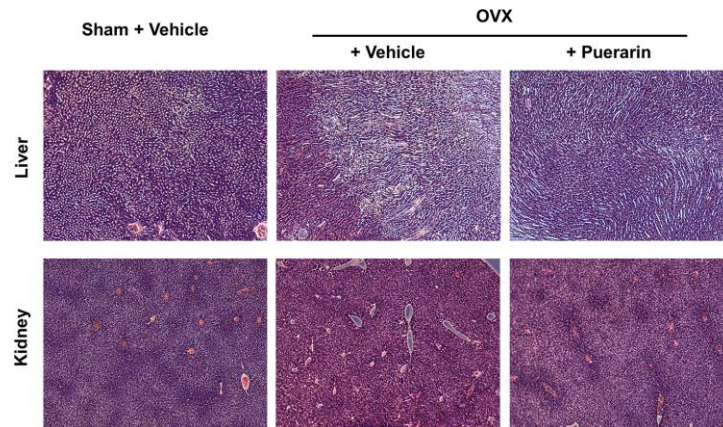

Supplementary Figure 1. H&E staining of the liver and kidney tissue sections in the puerarin treated OVX-induced osteoporosis model mice.

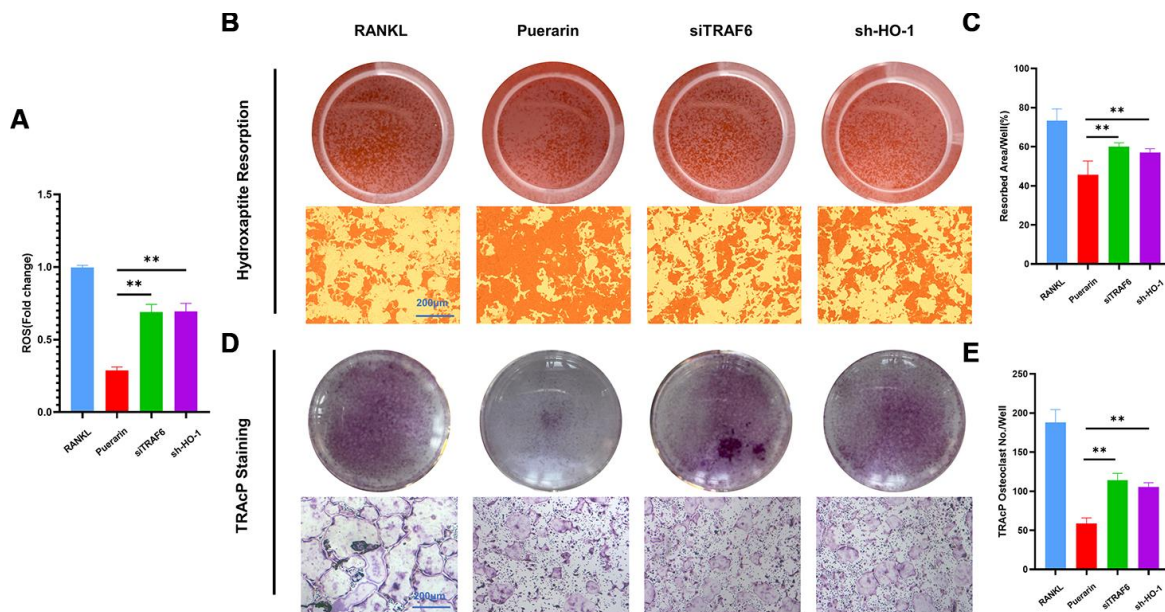

Supplementary Figure 2. Puerarin inhibits *in vitro* hydroxyapatite resorption activity of the osteoclasts and *in vitro* osteoclastogenesis by upregulating HO-1 and downregulating TRAF6. (A) Flow cytometry analysis of ROS levels by DCFH2-DA staining of control, HO-1 knockdown or TRAF6 overexpressing RAW264.7 cells treated with RANKL+puerarin. Note: n=3 per group, \*\*  $P < 0.01$  vs. the Puerarin-treatment control group. (B) Representative images show osteoclastogenesis efficiency based on hydroxyapatite resorption assay in the control, HO-1 knockdown or TRAF6 overexpressing RAW264.7 cells treated with RANKL+puerarin. (C) Quantitative analysis shows the hydroxyapatite resorbed area per osteoclast and the total resorbed hydroxyapatite area in the control, HO-1 knockdown or TRAF6 overexpressing RAW264.7 cells treated with RANKL+puerarin. Note: n=3 per group; \*\* $P < 0.01$  vs. the Puerarin-treatment group. (D) Representative images show osteoclastogenesis efficiency based on TRAcP staining in the control, HO-1 knockdown or TRAF6 overexpressing RAW264.7 cells treated with RANKL+puerarin. (E) Quantitative analysis of the TRAcP staining assay results show of the numbers of TRAcP-positive cells (>3 nuclei) in the control, HO-1 knockdown or TRAF6 overexpressing RAW264.7 cells treated with RANKL+puerarin. Note: n=3 per group; \*\* $P < 0.01$  vs. the Puerarin-treatment group.

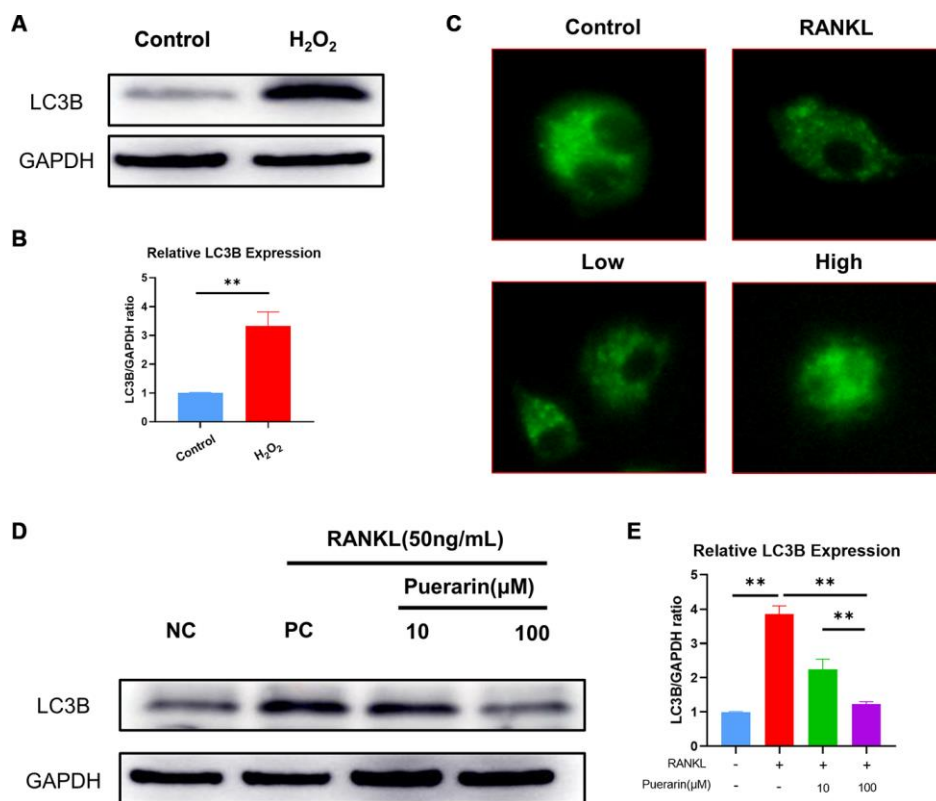

**Supplementary Figure 3. Puerarin suppresses autophagy in the *in vitro* differentiated osteoclasts.** (A, B) Western blot analysis shows LC3B levels in the control, H<sub>2</sub>O<sub>2</sub>-induced RAW264.7 cells. Note: n=3 per group; \*\* *P* < 0.01 vs. the control group. (C) Representative images show the MDC staining in the control, RANKL-induced and RANKL+Low/High dose puerarin-treated RAW264.7 cells. (D–E) Western blot analysis of cell lysates with antibodies against LC3B in the control, RANKL-, low-dose puerarin+ RANKL-, and high-dose puerarin+ RANKL-treated RAW264.7 cells. Note: n=3 per group, \*\* *P* < 0.01 vs. the RANKL-induced group.

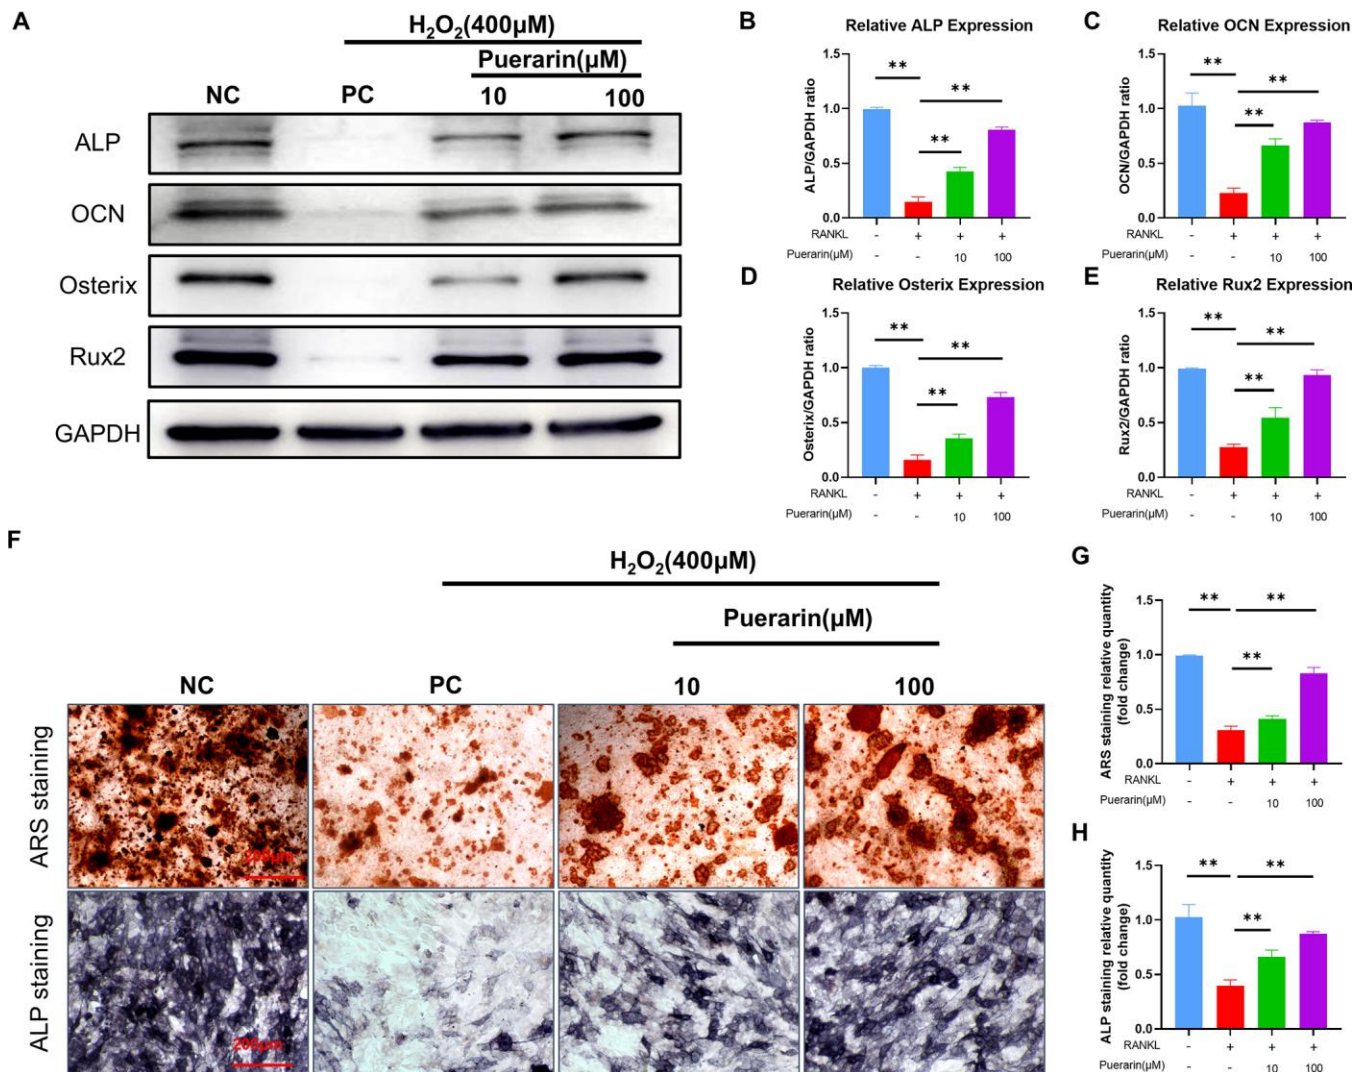

**Supplementary Figure 4. Puerarin reduces ROS-induced inhibition of osteoblast differentiation in MC3T3-E1 cells.** (A–E) Western blot analysis shows the expression of ALP, OCN, Osterix and Rux2 proteins in the control, H<sub>2</sub>O<sub>2</sub>, low-dose puerarin+ H<sub>2</sub>O<sub>2</sub>, and high-dose puerarin+ H<sub>2</sub>O<sub>2</sub>-treated MC3T3-E1 cells. Note: n=3 per group, \*\* *P* < 0.01 vs. the H<sub>2</sub>O<sub>2</sub>-induced group (F–H) Representative images and quantitative analysis shows the ARS and ALP staining in the control, H<sub>2</sub>O<sub>2</sub>, low-dose puerarin+ H<sub>2</sub>O<sub>2</sub>, and high-dose puerarin+ H<sub>2</sub>O<sub>2</sub>-treated MC3T3-E1 cells. Note: n=3 per group, \*\* *P* < 0.01 vs. the H<sub>2</sub>O<sub>2</sub>-induced group.

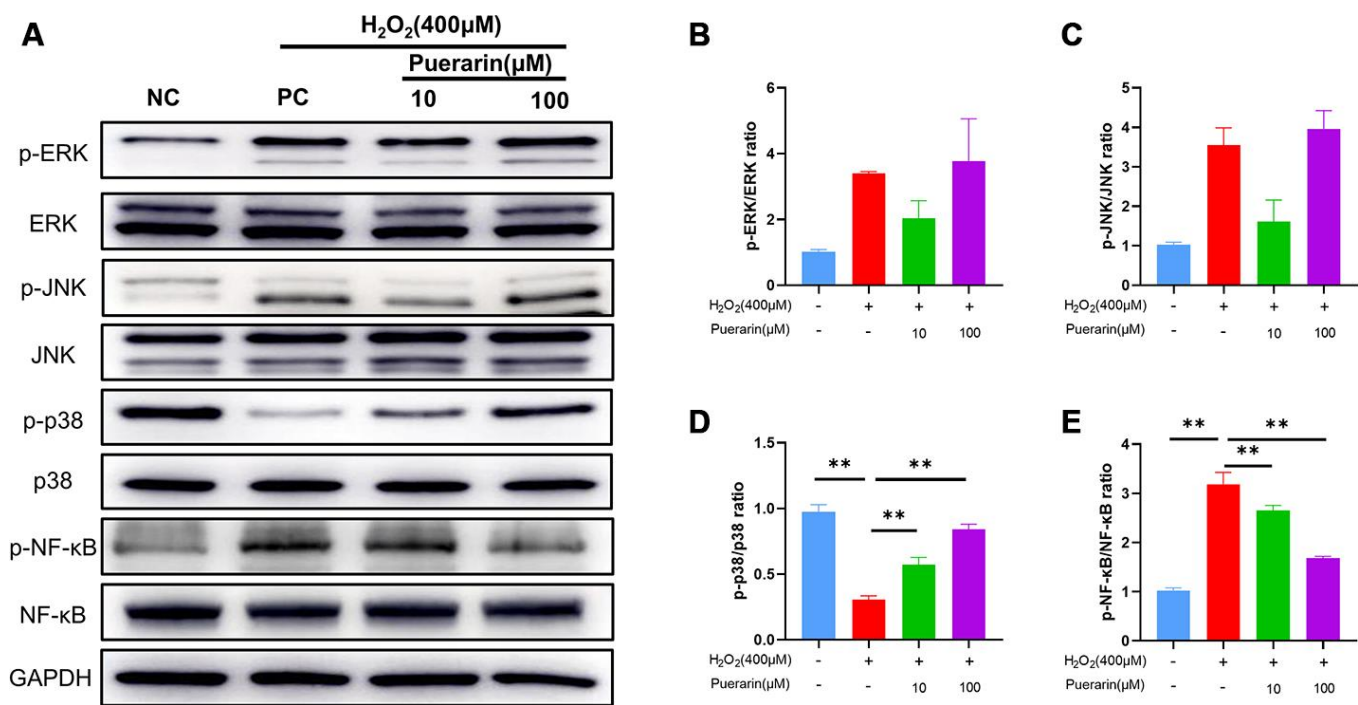

**Supplementary Figure 5. Puerarin reduces ROS-induced inhibition of osteoblast differentiation by activating p38 MAPK and downregulating NF-κB signaling.** (A) Western blot analysis shows the levels of p-ERK, ERK, p-JNK, JNK, p-p38, p38, p-NF-κB, NF-κB and GAPDH in the control, H<sub>2</sub>O<sub>2</sub><sup>-</sup>, low-dose puerarin+ H<sub>2</sub>O<sub>2</sub><sup>-</sup>, and high-dose puerarin+ H<sub>2</sub>O<sub>2</sub><sup>-</sup>-treated MC3T3-E1 cells. (B–E) Quantitative analysis shows ratios of p-ERK/ERK, p-JNK/JNK, p-p38/p38 and p-NF-κB/NF-κB in the control, H<sub>2</sub>O<sub>2</sub><sup>-</sup>, low-dose puerarin+ H<sub>2</sub>O<sub>2</sub><sup>-</sup>, and high-dose puerarin+ H<sub>2</sub>O<sub>2</sub><sup>-</sup>-treated MC3T3-E1 cells. Note: n=3 per group; \*\* *P* < 0.01.
